# Supplementary material for: Reasons for Non-Enrollment in Treatment among Multi-Drug Resistant Tuberculosis Patients in Hunan Province, China
Source: PubMed Central journal article supplement (PMC5257000; doi:10.1371/journal.pone.0170718), 2017-01-23
Supplement: pone.0170718.s001.pdf [file pone.0170718.s001.pdf]

| Patient number | Sex   | Age | Reside | Location       | Occupation            | Treatment history classification | Enrollment   | Reasons for non-enrollment    |
|----------------|-------|-----|--------|----------------|-----------------------|----------------------------------|--------------|-------------------------------|
| 1              | Male  | 51  | Urban  | Northern       | City worker           | Relapse                          | Enrolled     |                               |
| 2              | Femal | 43  | Rural  | Northern       | Farmer                | Retreatment failure              | Enrolled     |                               |
| 3              | Femal | 50  | Urban  | Northern       | Unemployed/unreported | Retreatment failure              | Enrolled     |                               |
| 4              | Male  | 31  | Rural  | Unknown        | Farmer                | New                              | Not enrolled | Unknown address               |
| 5              | Male  | 64  | Rural  | Northern       | Farmer                | Retreatment failure              | Not enrolled | Death                         |
| 6              | Male  | 36  | Rural  | Other province | Farmer                | Retreatment failure              | Not enrolled | Migrants from other provinces |
| 7              | Male  | 52  | Urban  | Central        | City worker           | Relapse                          | Enrolled     |                               |
| 8              | Femal | 28  | Rural  | Northern       | Farmer                | Retreatment failure              | Not enrolled | Non-standard treatment        |
| 9              | Male  | 46  | Rural  | Northern       | Farmer                | Relapse                          | Enrolled     |                               |
| 10             | Male  | 50  | Rural  | Northern       | Farmer                | Retreatment failure              | Enrolled     |                               |
| 11             | Male  | 47  | Rural  | Central        | Farmer                | New                              | Enrolled     |                               |
| 12             | Male  | 50  | Rural  | Northern       | Farmer                | New                              | Not enrolled | Out-migration                 |
| 13             | Male  | 42  | Rural  | Central        | Farmer                | Relapse                          | Enrolled     |                               |
| 14             | Male  | 60  | Rural  | Central        | Farmer                | Smear+ after 3 ms                | Enrolled     |                               |
| 15             | Male  | 60  | Rural  | Southern       | Farmer                | New                              | Enrolled     |                               |
| 16             | Male  | 42  | Rural  | Southern       | Farmer                | Retreatment failure              | Not enrolled | Out-migration                 |
| 17             | Male  | 54  | Rural  | Southern       | Farmer                | Relapse                          | Not enrolled | Economic hardship             |
| 18             | Male  | 37  | Rural  | Southern       | Farmer                | Retreatment failure              | Enrolled     |                               |
| 19             | Male  | 30  | Rural  | Western        | Farmer                | Retreatment failure              | Enrolled     |                               |
| 20             | Male  | 26  | Rural  | Southern       | Farmer                | Retreatment failure              | Enrolled     |                               |
| 21             | Male  | 55  | Rural  | Southern       | Farmer                | Retreatment failure              | Not enrolled | Death                         |
| 22             | Male  | 34  | Rural  | Other province | Farmer                | Initial treatment failur         | Not enrolled | Migrants from other provinces |
| 23             | Male  | 64  | Rural  | Western        | Farmer                | New                              | Enrolled     |                               |
| 24             | Femal | 23  | Rural  | Southwestern   | Farmer                | Retreatment failure              | Enrolled     |                               |
| 25             | Femal | 74  | Rural  | Southwestern   | Farmer                | Retreatment failure              | Enrolled     |                               |
| 26             | Male  | 44  | Rural  | Northern       | Farmer                | New                              | Enrolled     |                               |
| 27             | Male  | 66  | Rural  | Northern       | Farmer                | Retreatment failure              | Not enrolled | Death                         |
| 28             | Male  | 49  | Urban  | Central        | City worker           | New                              | Enrolled     |                               |
| 29             | Male  | 25  | Rural  | Northern       | Farmer                | New                              | Enrolled     |                               |
| 30             | Femal | 19  | Rural  | Southwestern   | Farmer                | New                              | Not enrolled | studies                       |
| 31             | Male  | 62  | Rural  | Central        | Farmer                | Relapse                          | Not enrolled | Economic hardship             |
| 32             | Male  | 50  | Rural  | Central        | Farmer                | New                              | Enrolled     |                               |
| 33             | Male  | 59  | Rural  | Central        | Farmer                | Relapse                          | Not enrolled | Economic hardship             |
| 34             | Male  | 51  | Rural  | Northern       | Farmer                | Return or other                  | Not enrolled | Economic hardship             |
| 35             | Femal | 38  | Urban  | Central        | City worker           | Retreatment failure              | Enrolled     |                               |
| 36             | Male  | 35  | Urban  | Western        | City worker           | Retreatment failure              | Enrolled     |                               |
| 37             | Male  | 65  | Rural  | Northern       | Farmer                | Relapse                          | Not enrolled | Economic hardship             |
| 38             | Male  | 57  | Rural  | Southern       | Farmer                | Retreatment failure              | Not enrolled | Economic hardship             |
| 39             | Male  | 41  | Rural  | Southwestern   | Farmer                | Retreatment failure              | Enrolled     |                               |
| 40             | Femal | 39  | Urban  | Unknown        | City worker           | Retreatment failure              | Not enrolled | Unknown address               |
| 41             | Femal | 47  | Rural  | Southern       | Farmer                | Relapse                          | Enrolled     |                               |
| 42             | Male  | 60  | Rural  | Unknown        | City worker           | New                              | Not enrolled | Unknown address               |
| 43             | Femal | 32  | Rural  | Western        | Farmer                | Retreatment failure              | Enrolled     |                               |
| 44             | Femal | 61  | Rural  | Central        | Farmer                | Relapse                          | Not enrolled | Economic hardship             |
| 45             | Male  | 48  | Rural  | Northern       | Farmer                | Return or other                  | Not enrolled | Out-migration                 |
| 46             | Male  | 39  | Rural  | Northern       | Farmer                | Relapse                          | Enrolled     |                               |
| 47             | Male  | 26  | Rural  | Southern       | Farmer                | Relapse                          | Enrolled     |                               |
| 48             | Femal | 28  | Urban  | Unknown        | City worker           | Relapse                          | Not enrolled | Unknown address               |
| 49             | Male  | 38  | Rural  | Southwestern   | City worker           | Retreatment failure              | Not enrolled | Out-migration                 |
| 50             | Male  | 42  | Urban  | Unknown        | City worker           | Retreatment failure              | Not enrolled | Unknown address               |
| 51             | Femal | 48  | Rural  | Southwestern   | Farmer                | Relapse                          | Enrolled     |                               |
| 52             | Male  | 38  | Rural  | Central        | Farmer                | Relapse                          | Enrolled     |                               |
| 53             | Femal | 25  | Rural  | Southern       | Farmer                | Initial treatment failur         | Enrolled     |                               |
| 54             | Male  | 34  | Rural  | Central        | Farmer                | Retreatment failure              | Enrolled     |                               |
| 55             | Femal | 31  | Urban  | Central        | City worker           | Relapse                          | Not enrolled | studies                       |
| 56             | Male  | 49  | Rural  | Northern       | Farmer                | Relapse                          | Not enrolled | Economic hardship             |
| 57             | Male  | 41  | Rural  | Southern       | Farmer                | Retreatment failure              | Enrolled     |                               |
| 58             | Male  | 44  | Rural  | Central        | Farmer                | New                              | Enrolled     |                               |

|     |       |    |       |                |                       |                          |              |                                |
|-----|-------|----|-------|----------------|-----------------------|--------------------------|--------------|--------------------------------|
| 59  | Male  | 54 | Rural | Central        | Farmer                | Relapse                  | Enrolled     |                                |
| 60  | Male  | 42 | Rural | Central        | Farmer                | Retreatment failure      | Enrolled     |                                |
| 61  | Femal | 33 | Rural | Southern       | Farmer                | Retreatment failure      | Enrolled     |                                |
| 62  | Femal | 58 | Rural | Central        | Farmer                | New                      | Enrolled     |                                |
| 63  | Male  | 48 | Rural | Southwestern   | Farmer                | Retreatment failure      | Enrolled     |                                |
| 64  | Male  | 59 | Rural | Unknown        | City worker           | Initial treatment failur | Not enrolled | Unknown address                |
| 65  | Male  | 34 | Rural | Central        | Farmer                | Initial treatment failur | Enrolled     |                                |
| 66  | Femal | 29 | Rural | Central        | City worker           | Smear+ after 3 ms        | Not enrolled | Non-standard treatment         |
| 67  | Femal | 45 | Rural | Northern       | Farmer                | Relapse                  | Not enrolled | Out-migration                  |
| 68  | Femal | 28 | Urban | Southwestern   | Unemployed/unreported | Relapse                  | Not enrolled | Death                          |
| 69  | Femal | 78 | Urban | Central        | City worker           | Retreatment failure      | Not enrolled | Other severe disease           |
| 70  | Femal | 49 | Rural | Southern       | City worker           | Retreatment failure      | Not enrolled | studies                        |
| 71  | Femal | 34 | Urban | Central        | City worker           | Retreatment failure      | Enrolled     |                                |
| 72  | Femal | 53 | Rural | Northern       | Farmer                | Retreatment failure      | Enrolled     |                                |
| 73  | Male  | 54 | Rural | Unknown        | Farmer                | Retreatment failure      | Enrolled     |                                |
| 74  | Male  | 60 | Rural | Northern       | Farmer                | New                      | Enrolled     |                                |
| 75  | Male  | 31 | Rural | Northern       | Farmer                | New                      | Enrolled     |                                |
| 76  | Male  | 58 | Rural | Southern       | Farmer                | Relapse                  | Enrolled     |                                |
| 77  | Male  | 61 | Urban | Southern       | Retired/Student       | Relapse                  | Enrolled     |                                |
| 78  | Male  | 61 | Rural | Central        | Farmer                | Smear+ after 3 ms        | Enrolled     |                                |
| 79  | Male  | 36 | Rural | Southern       | Farmer                | Retreatment failure      | Enrolled     |                                |
| 80  | Male  | 36 | Rural | Southwestern   | Farmer                | Retreatment failure      | Not enrolled | Concern about work and studies |
| 81  | Male  | 25 | Rural | Central        | Farmer                | Relapse                  | Enrolled     |                                |
| 82  | Male  | 52 | Rural | Southern       | Farmer                | Retreatment failure      | Enrolled     |                                |
| 83  | Male  | 20 | Urban | Central        | City worker           | Retreatment failure      | Not enrolled | Concern about work and studies |
| 84  | Male  | 29 | Rural | Central        | Farmer                | Retreatment failure      | Not enrolled | Non-standard treatment         |
| 85  | Femal | 62 | Rural | Southwestern   | City worker           | Retreatment failure      | Not enrolled | studies                        |
| 86  | Male  | 32 | Rural | Central        | Farmer                | Retreatment failure      | Enrolled     |                                |
| 87  | Male  | 24 | Rural | Northern       | Farmer                | Retreatment failure      | Enrolled     |                                |
| 88  | Male  | 47 | Rural | Southwestern   | Farmer                | Retreatment failure      | Enrolled     |                                |
| 89  | Male  | 45 | Urban | Western        | Unemployed/unreported | Initial treatment failur | Enrolled     |                                |
| 90  | Male  | 58 | Rural | Southwestern   | Farmer                | Retreatment failure      | Not enrolled | Death                          |
| 91  | Male  | 75 | Rural | Northern       | Farmer                | Relapse                  | Not enrolled | Economic hardship              |
| 92  | Male  | 57 | Urban | Northern       | Unemployed/unreported | Return or other          | Not enrolled | studies                        |
| 93  | Male  | 57 | Rural | Northern       | Farmer                | Retreatment failure      | Enrolled     |                                |
| 94  | Male  | 53 | Rural | Northern       | Farmer                | Relapse                  | Enrolled     |                                |
| 95  | Male  | 19 | Urban | Central        | Unemployed/unreported | New                      | Not enrolled | studies                        |
| 96  | Male  | 46 | Rural | Southern       | Farmer                | Retreatment failure      | Enrolled     |                                |
| 97  | Male  | 43 | Rural | Northern       | Farmer                | Relapse                  | Enrolled     |                                |
| 98  | Femal | 23 | Rural | Other province | Farmer                | Retreatment failure      | Enrolled     |                                |
| 99  | Male  | 63 | Rural | Northern       | Retired/Student       | Relapse                  | Enrolled     |                                |
| 100 | Femal | 27 | Rural | Northern       | Farmer                | Retreatment failure      | Enrolled     |                                |
| 101 | Male  | 75 | Urban | Central        | City worker           | Retreatment failure      | Not enrolled | Other severe disease           |
| 102 | Male  | 77 | Urban | Central        | Retired/Student       | Relapse                  | Enrolled     |                                |
| 103 | Male  | 74 | Rural | Northern       | Farmer                | Retreatment failure      | Not enrolled | Other severe disease           |
| 104 | Male  | 51 | Rural | Central        | Farmer                | Relapse                  | Enrolled     |                                |
| 105 | Male  | 30 | Urban | Central        | City worker           | Relapse                  | Not enrolled | studies                        |
| 106 | Male  | 30 | Rural | Southwestern   | Farmer                | Initial treatment failur | Enrolled     |                                |
| 107 | Male  | 29 | Rural | Northern       | Farmer                | New                      | Not enrolled | Economic hardship              |
| 108 | Femal | 19 | Urban | Southwestern   | Retired/Student       | Relapse                  | Enrolled     |                                |
| 109 | Femal | 61 | Urban | Southwestern   | Retired/Student       | Relapse                  | Enrolled     |                                |
| 110 | Male  | 55 | Urban | Unknown        | Unemployed/unreported | New                      | Not enrolled | Unknown address                |
| 111 | Male  | 37 | Rural | Northern       | Farmer                | Relapse                  | Enrolled     |                                |
| 112 | Femal | 51 | Rural | Northern       | Farmer                | Relapse                  | Enrolled     |                                |
| 113 | Femal | 49 | Rural | Southern       | Farmer                | Initial treatment failur | Enrolled     |                                |
| 114 | Male  | 55 | Rural | Northern       | City worker           | Retreatment failure      | Not enrolled | Belief of being cured          |
| 115 | Male  | 64 | Rural | Central        | Farmer                | Relapse                  | Enrolled     |                                |
| 116 | Male  | 44 | Urban | Northern       | City worker           | Retreatment failure      | Enrolled     |                                |
| 117 | Femal | 40 | Rural | Southwestern   | Farmer                | Initial treatment failur | Enrolled     |                                |
| 118 | Male  | 31 | Rural | Southern       | City worker           | Relapse                  | Not enrolled | studies                        |
| 119 | Male  | 62 | Rural | Northern       | City worker           | Initial treatment failur | Not enrolled | studies                        |

|     |       |    |       |              |                 |                           |              |                                |
|-----|-------|----|-------|--------------|-----------------|---------------------------|--------------|--------------------------------|
| 120 | Male  | 77 | Rural | Southwestern | Farmer          | Retreatment failure       | Enrolled     |                                |
| 121 | Male  | 38 | Rural | Southwestern | Farmer          | Retreatment failure       | Enrolled     |                                |
| 122 | Femal | 48 | Rural | Central      | Farmer          | Retreatment failure       | Enrolled     |                                |
| 123 | Femal | 23 | Rural | Southern     | Farmer          | Relapse                   | Enrolled     |                                |
| 124 | Male  | 66 | Rural | Southern     | Retired/Student | Retreatment failure       | Enrolled     |                                |
| 125 | Male  | 38 | Rural | Southwestern | Farmer          | Relapse                   | Enrolled     |                                |
| 126 | Male  | 63 | Rural | Northern     | Farmer          | Initial treatment failure | Enrolled     |                                |
| 127 | Femal | 48 | Rural | Northern     | Farmer          | Retreatment failure       | Enrolled     |                                |
| 128 | Femal | 29 | Rural | Western      | Farmer          | Retreatment failure       | Enrolled     |                                |
| 129 | Male  | 19 | Rural | Northern     | City worker     | Relapse                   | Not enrolled | studies                        |
| 130 | Male  | 22 | Rural | Central      | Farmer          | New                       | Enrolled     |                                |
| 131 | Male  | 24 | Rural | Northern     | City worker     | Retreatment failure       | Not enrolled | studies                        |
| 132 | Male  | 26 | Urban | Northern     | City worker     | Smear+ after 3 ms         | Enrolled     |                                |
| 133 | Femal | 39 | Rural | Western      | City worker     | Retreatment failure       | Not enrolled | Belief of being cured          |
| 134 | Femal | 45 | Rural | Western      | Farmer          | Retreatment failure       | Enrolled     |                                |
| 135 | Male  | 40 | Rural | Southern     | Farmer          | Initial treatment failure | Enrolled     |                                |
| 136 | Male  | 11 | Urban | Southern     | Retired/Student | Retreatment failure       | Not enrolled | Non-standard treatment         |
| 137 | Male  | 53 | Rural | Northern     | City worker     | Retreatment failure       | Not enrolled | studies                        |
| 138 | Male  | 60 | Rural | Central      | Farmer          | Relapse                   | Not enrolled | Economic hardship              |
| 139 | Femal | 50 | Rural | Southern     | Farmer          | Smear+ after 3 ms         | Enrolled     |                                |
| 140 | Male  | 38 | Rural | Western      | Farmer          | Retreatment failure       | Enrolled     |                                |
| 141 | Femal | 19 | Urban | Central      | Retired/Student | Initial treatment failure | Enrolled     |                                |
| 142 | Male  | 39 | Rural | Southern     | Farmer          | New                       | Enrolled     |                                |
| 143 | Male  | 28 | Rural | Southern     | Farmer          | New                       | Enrolled     |                                |
| 144 | Male  | 43 | Rural | Central      | Farmer          | Relapse                   | Not enrolled | Concern about work and studies |
| 145 | Femal | 24 | Rural | Central      | Farmer          | New                       | Enrolled     |                                |
| 146 | Male  | 39 | Rural | Southwestern | Farmer          | Retreatment failure       | Not enrolled | Non-standard treatment         |
| 147 | Male  | 58 | Rural | Northern     | City worker     | Retreatment failure       | Not enrolled | studies                        |
| 148 | Male  | 45 | Rural | Central      | Farmer          | New                       | Not enrolled | Economic hardship              |
| 149 | Male  | 21 | Rural | Northern     | Farmer          | Retreatment failure       | Enrolled     |                                |
| 150 | Male  | 38 | Rural | Northern     | Farmer          | Retreatment failure       | Enrolled     |                                |
| 151 | Femal | 36 | Urban | Southwestern | City worker     | Retreatment failure       | Not enrolled | studies                        |
| 152 | Male  | 31 | Rural | Western      | Farmer          | Relapse                   | Enrolled     |                                |
| 153 | Male  | 21 | Rural | Unknown      | Farmer          | Retreatment failure       | Enrolled     |                                |
| 154 | Male  | 21 | Rural | Northern     | Farmer          | Retreatment failure       | Enrolled     |                                |
| 155 | Femal | 53 | Rural | Northern     | Farmer          | Retreatment failure       | Enrolled     |                                |
| 156 | Male  | 60 | Rural | Southern     | Farmer          | New                       | Enrolled     |                                |
| 157 | Male  | 47 | Rural | Central      | Farmer          | Retreatment failure       | Enrolled     |                                |
| 158 | Male  | 42 | Rural | Northern     | City worker     | Relapse                   | Not enrolled | studies                        |
| 159 | Femal | 54 | Rural | Northern     | Farmer          | Retreatment failure       | Enrolled     |                                |
| 160 | Male  | 37 | Rural | Northern     | Farmer          | Retreatment failure       | Enrolled     |                                |
| 161 | Femal | 30 | Rural | Southwestern | Farmer          | Retreatment failure       | Enrolled     |                                |
| 162 | Femal | 49 | Rural | Central      | Farmer          | Initial treatment failure | Enrolled     |                                |
| 163 | Male  | 43 | Rural | Central      | Farmer          | New                       | Not enrolled | Economic hardship              |
| 164 | Femal | 51 | Rural | Southern     | Farmer          | Relapse                   | Not enrolled | Death                          |
| 165 | Male  | 42 | Urban | Southern     | City worker     | Return or other           | Enrolled     |                                |
| 166 | Male  | 71 | Rural | Southwestern | Retired/Student | Relapse                   | Enrolled     |                                |
| 167 | Male  | 43 | Rural | Northern     | Farmer          | Retreatment failure       | Enrolled     |                                |
| 168 | Femal | 20 | Rural | Central      | Farmer          | New                       | Enrolled     |                                |
| 169 | Femal | 41 | Rural | Northern     | Farmer          | Retreatment failure       | Enrolled     |                                |
| 170 | Male  | 50 | Rural | Northern     | Farmer          | Relapse                   | Enrolled     |                                |
| 171 | Male  | 71 | Rural | Southwestern | Farmer          | Relapse                   | Enrolled     |                                |
| 172 | Male  | 67 | Urban | Southwestern | City worker     | Retreatment failure       | Not enrolled | Concern about work and studies |
| 173 | Male  | 47 | Rural | Southwestern | Farmer          | Relapse                   | Enrolled     |                                |
| 174 | Femal | 36 | Rural | Northern     | Farmer          | Retreatment failure       | Not enrolled | Economic hardship              |
| 175 | Femal | 47 | Rural | Western      | Farmer          | Retreatment failure       | Enrolled     |                                |
| 176 | Male  | 23 | Rural | Northern     | Farmer          | Initial treatment failure | Enrolled     |                                |
| 177 | Femal | 19 | Rural | Northern     | Farmer          | Relapse                   | Not enrolled | Economic hardship              |
| 178 | Male  | 68 | Rural | Northern     | Farmer          | Relapse                   | Not enrolled | Economic hardship              |
| 179 | Male  | 67 | Rural | Northern     | Farmer          | Retreatment failure       | Not enrolled | Economic hardship              |
| 180 | Male  | 61 | Rural | Southern     | Farmer          | Retreatment failure       | Not enrolled | Out-migration                  |

|     |       |    |       |              |                       |                           |              |                       |
|-----|-------|----|-------|--------------|-----------------------|---------------------------|--------------|-----------------------|
| 181 | Male  | 57 | Urban | Northern     | City worker           | Retreatment failure       | Enrolled     |                       |
| 182 | Male  | 57 | Rural | Central      | Farmer                | New                       | Not enrolled | Economic hardship     |
| 183 | Femal | 53 | Urban | Unknown      | Unemployed/unreported | Retreatment failure       | Not enrolled | Unknown address       |
| 184 | Femal | 49 | Rural | Northern     | Farmer                | Retreatment failure       | Enrolled     |                       |
| 185 | Femal | 36 | Rural | Northern     | Farmer                | Retreatment failure       | Enrolled     |                       |
| 186 | Male  | 63 | Rural | Central      | Farmer                | Retreatment failure       | Not enrolled | studies               |
| 187 | Male  | 49 | Rural | Northern     | Farmer                | Retreatment failure       | Not enrolled | Out-migration         |
| 188 | Male  | 56 | Urban | Unknown      | City worker           | Retreatment failure       | Not enrolled | Unknown address       |
| 189 | Male  | 17 | Rural | Northern     | Retired/Student       | Initial treatment failure | Enrolled     |                       |
| 190 | Femal | 26 | Rural | Northern     | Farmer                | Retreatment failure       | Enrolled     |                       |
| 191 | Male  | 19 | Urban | Southwestern | Retired/Student       | Retreatment failure       | Enrolled     |                       |
| 192 | Male  | 63 | Rural | Northern     | Retired/Student       | Relapse                   | Enrolled     |                       |
| 193 | Male  | 63 | Rural | Northern     | Farmer                | New                       | Enrolled     |                       |
| 194 | Femal | 17 | Rural | Central      | Retired/Student       | Retreatment failure       | Enrolled     |                       |
| 195 | Male  | 32 | Urban | Unknown      | City worker           | Retreatment failure       | Not enrolled | Unknown address       |
| 196 | Male  | 20 | Rural | Southern     | Farmer                | New                       | Enrolled     |                       |
| 197 | Male  | 38 | Rural | Southern     | Farmer                | Retreatment failure       | Enrolled     |                       |
| 198 | Male  | 48 | Rural | Western      | Farmer                | Relapse                   | Enrolled     |                       |
| 199 | Male  | 55 | Rural | Southwestern | Farmer                | Retreatment failure       | Enrolled     |                       |
| 200 | Femal | 59 | Rural | Southern     | Farmer                | New                       | Enrolled     |                       |
| 201 | Male  | 22 | Rural | Northern     | Farmer                | New                       | Not enrolled | Belief of being cured |
| 202 | Male  | 18 | Rural | Northern     | Farmer                | Initial treatment failure | Not enrolled | studies               |
| 203 | Femal | 51 | Rural | Northern     | Farmer                | Retreatment failure       | Not enrolled | Belief of being cured |
| 204 | Male  | 41 | Rural | Northern     | Farmer                | Retreatment failure       | Enrolled     |                       |
| 205 | Male  | 38 | Rural | Northern     | Farmer                | Retreatment failure       | Enrolled     |                       |
| 206 | Male  | 56 | Rural | Southern     | Farmer                | Initial treatment failure | Enrolled     |                       |
| 207 | Male  | 61 | Rural | Southwestern | Farmer                | Relapse                   | Enrolled     |                       |
| 208 | Male  | 56 | Rural | Southwestern | Farmer                | Relapse                   | Enrolled     |                       |
| 209 | Male  | 54 | Rural | Central      | Farmer                | Retreatment failure       | Enrolled     |                       |
| 210 | Male  | 49 | Urban | Central      | Unemployed/unreported | Relapse                   | Enrolled     |                       |
| 211 | Male  | 76 | Rural | Southwestern | Farmer                | New                       | Not enrolled | Other severe disease  |
| 212 | Femal | 53 | Rural | Northern     | Farmer                | Relapse                   | Enrolled     |                       |
| 213 | Male  | 25 | Rural | Southwestern | Farmer                | Retreatment failure       | Not enrolled | Economic hardship     |
| 214 | Femal | 42 | Urban | Northern     | City worker           | Retreatment failure       | Enrolled     |                       |
| 215 | Femal | 60 | Rural | Southern     | Farmer                | Relapse                   | Enrolled     |                       |
| 216 | Male  | 75 | Rural | Central      | Farmer                | Retreatment failure       | Not enrolled | Economic hardship     |
| 217 | Femal | 31 | Rural | Southwestern | Farmer                | Retreatment failure       | Enrolled     |                       |
| 218 | Male  | 31 | Urban | Southern     | City worker           | Initial treatment failure | Enrolled     |                       |
| 219 | Femal | 28 | Urban | Unknown      | Unemployed/unreported | Retreatment failure       | Not enrolled | Unknown address       |
| 220 | Femal | 60 | Rural | Northern     | Farmer                | Retreatment failure       | Not enrolled | Economic hardship     |
| 221 | Femal | 60 | Rural | Central      | Farmer                | Relapse                   | Enrolled     |                       |
| 222 | Male  | 48 | Rural | Central      | Farmer                | Relapse                   | Enrolled     |                       |
| 223 | Male  | 59 | Rural | Central      | Farmer                | Relapse                   | Enrolled     |                       |
| 224 | Male  | 40 | Rural | Southern     | Farmer                | Retreatment failure       | Enrolled     |                       |
| 225 | Femal | 44 | Rural | Unknown      | Farmer                | Relapse                   | Enrolled     |                       |
| 226 | Male  | 50 | Urban | Southern     | City worker           | Retreatment failure       | Enrolled     |                       |
| 227 | Femal | 69 | Rural | Southwestern | Farmer                | Relapse                   | Enrolled     |                       |
| 228 | Femal | 51 | Rural | Central      | Farmer                | Relapse                   | Enrolled     |                       |
| 229 | Male  | 60 | Rural | Southern     | Farmer                | Retreatment failure       | Not enrolled | Economic hardship     |
| 230 | Male  | 58 | Rural | Southwestern | Farmer                | Relapse                   | Enrolled     |                       |
| 231 | Male  | 31 | Rural | Southern     | Farmer                | Retreatment failure       | Enrolled     |                       |
| 232 | Femal | 78 | Rural | Unknown      | Farmer                | Retreatment failure       | Not enrolled | Unknown address       |
| 233 | Male  | 31 | Rural | Central      | Farmer                | Relapse                   | Not enrolled | Economic hardship     |
| 234 | Male  | 30 | Rural | Northern     | Farmer                | Retreatment failure       | Enrolled     |                       |
| 235 | Femal | 29 | Rural | Northern     | Farmer                | Relapse                   | Not enrolled | Economic hardship     |
| 236 | Male  | 42 | Rural | Southern     | Farmer                | Retreatment failure       | Not enrolled | Out-migration         |
| 237 | Male  | 52 | Rural | Southern     | Farmer                | Relapse                   | Not enrolled | Economic hardship     |
| 238 | Male  | 72 | Rural | Central      | Farmer                | Initial treatment failure | Enrolled     |                       |
| 239 | Male  | 39 | Rural | Northern     | Farmer                | Retreatment failure       | Not enrolled | Belief of being cured |
| 240 | Male  | 62 | Urban | Central      | Retired/Student       | Retreatment failure       | Enrolled     |                       |
| 241 | Femal | 55 | Rural | Northern     | Farmer                | Relapse                   | Enrolled     |                       |

|     |       |    |       |              |                       |                           |              |                                |
|-----|-------|----|-------|--------------|-----------------------|---------------------------|--------------|--------------------------------|
| 242 | Male  | 23 | Rural | Central      | Farmer                | Retreatment failure       | Not enrolled | Economic hardship              |
| 243 | Femal | 53 | Rural | Northern     | Farmer                | Initial treatment failure | Enrolled     |                                |
| 244 | Male  | 56 | Rural | Southwestern | Farmer                | Retreatment failure       | Not enrolled | Economic hardship              |
| 245 | Male  | 44 | Rural | Southwestern | Farmer                | Retreatment failure       | Enrolled     |                                |
| 246 | Male  | 52 | Rural | Southern     | Farmer                | Smear+ after 3 ms         | Enrolled     |                                |
| 247 | Male  | 37 | Urban | Northern     | City worker           | Relapse                   | Enrolled     |                                |
| 248 | Male  | 60 | Urban | Southwestern | Unemployed/unreported | Retreatment failure       | Enrolled     |                                |
| 249 | Male  | 25 | Urban | Southern     | City worker           | Relapse                   | Enrolled     |                                |
| 250 | Male  | 57 | Urban | Northern     | City worker           | Retreatment failure       | Enrolled     |                                |
| 251 | Male  | 78 | Rural | Central      | Farmer                | Initial treatment failure | Enrolled     |                                |
| 252 | Male  | 18 | Rural | Southwestern | Retired/Student       | Retreatment failure       | Enrolled     |                                |
| 253 | Male  | 51 | Rural | Northern     | Farmer                | New                       | Enrolled     |                                |
| 254 | Femal | 44 | Rural | Northern     | Farmer                | Relapse                   | Enrolled     |                                |
| 255 | Femal | 33 | Rural | Central      | Farmer                | Retreatment failure       | Enrolled     |                                |
| 256 | Male  | 61 | Rural | Southwestern | Farmer                | New                       | Enrolled     |                                |
| 257 | Male  | 62 | Rural | Southern     | Farmer                | Retreatment failure       | Enrolled     |                                |
| 258 | Femal | 40 | Rural | Southern     | Farmer                | Relapse                   | Enrolled     |                                |
| 259 | Male  | 42 | Rural | Central      | Farmer                | Retreatment failure       | Enrolled     |                                |
| 260 | Male  | 41 | Rural | Central      | Farmer                | Retreatment failure       | Not enrolled | Death                          |
| 261 | Male  | 54 | Rural | Northern     | Farmer                | Relapse                   | Enrolled     |                                |
| 262 | Male  | 28 | Urban | Northern     | City worker           | New                       | Enrolled     |                                |
| 263 | Femal | 53 | Rural | Western      | Farmer                | Retreatment failure       | Not enrolled | Non-standard treatment         |
| 264 | Male  | 30 | Rural | Southwestern | Farmer                | Relapse                   | Enrolled     |                                |
| 265 | Male  | 45 | Rural | Southwestern | Farmer                | Retreatment failure       | Not enrolled | Out-migration                  |
| 266 | Male  | 44 | Rural | Northern     | Farmer                | Retreatment failure       | Enrolled     |                                |
| 267 | Femal | 43 | Rural | Southwestern | Farmer                | Retreatment failure       | Not enrolled | studies                        |
| 268 | Male  | 32 | Rural | Western      | Farmer                | Retreatment failure       | Enrolled     |                                |
| 269 | Male  | 57 | Rural | Northern     | Farmer                | Relapse                   | Enrolled     |                                |
| 270 | Male  | 54 | Rural | Southern     | Farmer                | Relapse                   | Enrolled     |                                |
| 271 | Male  | 41 | Rural | Central      | Farmer                | Retreatment failure       | Enrolled     |                                |
| 272 | Male  | 44 | Urban | Southern     | City worker           | Retreatment failure       | Enrolled     |                                |
| 273 | Male  | 62 | Rural | Southern     | Farmer                | Relapse                   | Not enrolled | Belief of being cured          |
| 274 | Male  | 37 | Rural | Southern     | Farmer                | New                       | Not enrolled | Out-migration                  |
| 275 | Male  | 37 | Rural | Northern     | Farmer                | Retreatment failure       | Enrolled     |                                |
| 276 | Femal | 43 | Rural | Northern     | Farmer                | Retreatment failure       | Enrolled     |                                |
| 277 | Femal | 32 | Rural | Southern     | Farmer                | Retreatment failure       | Enrolled     |                                |
| 278 | Male  | 38 | Rural | Southern     | Farmer                | Retreatment failure       | Enrolled     |                                |
| 279 | Male  | 23 | Urban | Southwestern | Unemployed/unreported | Retreatment failure       | Enrolled     |                                |
| 280 | Femal | 21 | Urban | Northern     | Unemployed/unreported | Retreatment failure       | Enrolled     |                                |
| 281 | Male  | 41 | Rural | Western      | Farmer                | Retreatment failure       | Enrolled     |                                |
| 282 | Male  | 70 | Rural | Northern     | Farmer                | Relapse                   | Not enrolled | Economic hardship              |
| 283 | Male  | 47 | Rural | Southern     | Farmer                | Relapse                   | Enrolled     |                                |
| 284 | Femal | 63 | Rural | Central      | Farmer                | Retreatment failure       | Enrolled     |                                |
| 285 | Femal | 19 | Urban | Southwestern | Retired/Student       | Retreatment failure       | Not enrolled | Non-standard treatment         |
| 286 | Male  | 71 | Rural | Northern     | Farmer                | New                       | Enrolled     |                                |
| 287 | Male  | 40 | Rural | Southern     | Farmer                | Retreatment failure       | Enrolled     |                                |
| 288 | Male  | 49 | Urban | Southern     | Unemployed/unreported | Retreatment failure       | Enrolled     |                                |
| 289 | Femal | 44 | Urban | Central      | Unemployed/unreported | Retreatment failure       | Enrolled     |                                |
| 290 | Male  | 43 | Rural | Western      | Farmer                | Relapse                   | Enrolled     |                                |
| 291 | Male  | 78 | Rural | Northern     | Farmer                | New                       | Enrolled     |                                |
| 292 | Femal | 43 | Urban | Southwestern | Unemployed/unreported | Retreatment failure       | Enrolled     |                                |
| 293 | Male  | 27 | Rural | Southwestern | Farmer                | Retreatment failure       | Not enrolled | Economic hardship              |
| 294 | Male  | 46 | Rural | Southwestern | Farmer                | Relapse                   | Not enrolled | Concern about work and studies |
| 295 | Male  | 59 | Rural | Central      | Farmer                | Retreatment failure       | Not enrolled | Non-standard treatment         |
| 296 | Male  | 22 | Rural | Southwestern | Farmer                | New                       | Not enrolled | Economic hardship              |
| 297 | Femal | 42 | Rural | Southern     | Farmer                | Relapse                   | Enrolled     |                                |
| 298 | Male  | 47 | Rural | Northern     | Farmer                | Retreatment failure       | Not enrolled | Belief of being cured          |
| 299 | Male  | 44 | Urban | Southern     | Unemployed/unreported | Retreatment failure       | Enrolled     |                                |
| 300 | Male  | 61 | Rural | Central      | Farmer                | Retreatment failure       | Enrolled     |                                |
| 301 | Male  | 49 | Rural | Southern     | Farmer                | Retreatment failure       | Enrolled     |                                |
| 302 | Femal | 41 | Rural | Southern     | Farmer                | Retreatment failure       | Not enrolled | Concern about work and studies |

|     |       |    |       |              |                       |                          |              |                                |
|-----|-------|----|-------|--------------|-----------------------|--------------------------|--------------|--------------------------------|
| 303 | Male  | 64 | Rural | Central      | Farmer                | Relapse                  | Enrolled     |                                |
| 304 | Femal | 51 | Rural | Southern     | Farmer                | Retreatment failure      | Not enrolled | Economic hardship              |
| 305 | Femal | 27 | Rural | Central      | Farmer                | Retreatment failure      | Enrolled     |                                |
| 306 | Male  | 48 | Rural | Northern     | Farmer                | New                      | Enrolled     |                                |
| 307 | Male  | 49 | Rural | Southwestern | Farmer                | Retreatment failure      | Not enrolled | Economic hardship              |
| 308 | Femal | 32 | Rural | Southern     | Farmer                | Relapse                  | Enrolled     |                                |
| 309 | Femal | 58 | Rural | Southern     | Farmer                | New                      | Enrolled     |                                |
| 310 | Male  | 62 | Rural | Central      | Farmer                | Smear+ after 3 ms        | Enrolled     |                                |
| 311 | Male  | 53 | Rural | Western      | Farmer                | Retreatment failure      | Enrolled     |                                |
| 312 | Femal | 27 | Rural | Central      | Farmer                | Initial treatment failur | Enrolled     |                                |
| 313 | Femal | 23 | Urban | Southern     | City worker           | Retreatment failure      | Enrolled     |                                |
| 314 | Male  | 32 | Urban | Southern     | City worker           | Retreatment failure      | Enrolled     |                                |
| 315 | Femal | 32 | Rural | Southwestern | Farmer                | Relapse                  | Enrolled     |                                |
| 316 | Male  | 80 | Rural | Northern     | Farmer                | Relapse                  | Not enrolled | Economic hardship              |
| 317 | Femal | 49 | Urban | Southwestern | Unemployed/unreported | Retreatment failure      | Not enrolled | Out-migration                  |
| 318 | Male  | 43 | Urban | Southwestern | Unemployed/unreported | Retreatment failure      | Enrolled     |                                |
| 319 | Male  | 67 | Urban | Southwestern | Retired/Student       | Relapse                  | Enrolled     |                                |
| 320 | Male  | 66 | Rural | Central      | Farmer                | Retreatment failure      | Not enrolled | Economic hardship              |
| 321 | Male  | 54 | Rural | Northern     | Farmer                | Retreatment failure      | Not enrolled | studies                        |
| 322 | Male  | 74 | Rural | Central      | Farmer                | Relapse                  | Not enrolled | Other severe disease           |
| 323 | Male  | 50 | Rural | Northern     | Farmer                | Retreatment failure      | Enrolled     |                                |
| 324 | Femal | 48 | Rural | Northern     | Farmer                | Return or other          | Enrolled     |                                |
| 325 | Femal | 49 | Rural | Northern     | Farmer                | Initial treatment failur | Enrolled     |                                |
| 326 | Femal | 77 | Rural | Northern     | Farmer                | Retreatment failure      | Not enrolled | Economic hardship              |
| 327 | Male  | 80 | Rural | Northern     | Farmer                | Retreatment failure      | Not enrolled | Other severe disease           |
| 328 | Male  | 22 | Rural | Unknown      | Farmer                | Retreatment failure      | Enrolled     |                                |
| 329 | Femal | 18 | Rural | Central      | Retired/Student       | Retreatment failure      | Not enrolled | Concern about work and studies |
| 330 | Male  | 40 | Rural | Southwestern | Farmer                | Retreatment failure      | Enrolled     |                                |
| 331 | Femal | 27 | Rural | Northern     | Farmer                | Retreatment failure      | Enrolled     |                                |
| 332 | Male  | 55 | Rural | Northern     | Farmer                | Relapse                  | Enrolled     |                                |
| 333 | Male  | 50 | Urban | Northern     | City worker           | Relapse                  | Enrolled     |                                |
| 334 | Male  | 66 | Rural | Central      | Farmer                | Return or other          | Not enrolled | Economic hardship              |
| 335 | Male  | 50 | Rural | Northern     | Farmer                | Retreatment failure      | Not enrolled | Non-standard treatment         |
| 336 | Male  | 51 | Rural | Southern     | Farmer                | Retreatment failure      | Enrolled     |                                |
| 337 | Male  | 22 | Rural | Central      | Farmer                | Relapse                  | Enrolled     |                                |
| 338 | Male  | 51 | Urban | Central      | Unemployed/unreported | Relapse                  | Enrolled     |                                |
| 339 | Femal | 43 | Rural | Northern     | Farmer                | Retreatment failure      | Enrolled     |                                |
| 340 | Femal | 60 | Rural | Central      | Farmer                | Relapse                  | Enrolled     |                                |
| 341 | Male  | 60 | Rural | Northern     | Unemployed/unreported | Retreatment failure      | Enrolled     |                                |
| 342 | Male  | 38 | Rural | Central      | Farmer                | Relapse                  | Enrolled     |                                |
| 343 | Male  | 70 | Rural | Southern     | Farmer                | New                      | Not enrolled | Economic hardship              |
| 344 | Male  | 55 | Rural | Southern     | Farmer                | Relapse                  | Enrolled     |                                |
| 345 | Male  | 26 | Rural | Central      | Farmer                | Retreatment failure      | Not enrolled | Out-migration                  |
| 346 | Femal | 28 | Rural | Northern     | Farmer                | New                      | Not enrolled | Out-migration                  |
| 347 | Male  | 37 | Rural | Southern     | Unemployed/unreported | Retreatment failure      | Enrolled     |                                |
| 348 | Male  | 48 | Rural | Southern     | Farmer                | Retreatment failure      | Enrolled     |                                |
| 349 | Male  | 58 | Rural | Southern     | Farmer                | New                      | Enrolled     |                                |
| 350 | Male  | 50 | Rural | Southern     | Farmer                | Retreatment failure      | Not enrolled | Non-standard treatment         |
| 351 | Femal | 36 | Rural | Southwestern | Farmer                | Retreatment failure      | Not enrolled | Out-migration                  |
| 352 | Femal | 45 | Rural | Southern     | Farmer                | Relapse                  | Enrolled     |                                |
| 353 | Male  | 67 | Rural | Southern     | Farmer                | Retreatment failure      | Not enrolled | Other severe disease           |
| 354 | Male  | 48 | Rural | Northern     | Farmer                | Initial treatment failur | Not enrolled | Out-migration                  |
| 355 | Male  | 44 | Rural | Northern     | Farmer                | Retreatment failure      | Enrolled     |                                |
| 356 | Male  | 61 | Rural | Central      | Farmer                | Relapse                  | Not enrolled | Out-migration                  |
| 357 | Male  | 43 | Rural | Southern     | Farmer                | Retreatment failure      | Enrolled     |                                |
| 358 | Male  | 41 | Rural | Southern     | Farmer                | Retreatment failure      | Enrolled     |                                |
| 359 | Femal | 54 | Urban | Northern     | Unemployed/unreported | New                      | Not enrolled | studies                        |
| 360 | Male  | 33 | Rural | Southern     | Farmer                | Retreatment failure      | Not enrolled | Non-standard treatment         |
| 361 | Male  | 43 | Rural | Southwestern | Farmer                | Retreatment failure      | Enrolled     |                                |
| 362 | Femal | 22 | Urban | Southern     | City worker           | New                      | Enrolled     |                                |
| 363 | Male  | 38 | Rural | Northern     | Farmer                | Retreatment failure      | Enrolled     |                                |

|     |       |    |       |              |                       |                           |              |                                |
|-----|-------|----|-------|--------------|-----------------------|---------------------------|--------------|--------------------------------|
| 364 | Male  | 54 | Rural | Northern     | Farmer                | New                       | Enrolled     |                                |
| 365 | Femal | 29 | Urban | Southwestern | City worker           | Relapse                   | Enrolled     |                                |
| 366 | Femal | 31 | Rural | Northern     | Farmer                | Retreatment failure       | Enrolled     |                                |
| 367 | Male  | 46 | Rural | Central      | Farmer                | Retreatment failure       | Enrolled     |                                |
| 368 | Male  | 31 | Rural | Southwestern | Farmer                | New                       | Enrolled     |                                |
| 369 | Femal | 58 | Rural | Central      | Farmer                | New                       | Not enrolled | Out-migration                  |
| 370 | Male  | 62 | Rural | Northern     | Farmer                | New                       | Not enrolled | Economic hardship              |
| 371 | Male  | 54 | Urban | Southwestern | City worker           | Relapse                   | Enrolled     |                                |
| 372 | Male  | 48 | Rural | Southern     | Farmer                | Relapse                   | Enrolled     |                                |
| 373 | Male  | 15 | Rural | Southern     | Retired/Student       | Retreatment failure       | Enrolled     |                                |
| 374 | Male  | 63 | Rural | Southern     | Farmer                | Retreatment failure       | Enrolled     |                                |
| 375 | Male  | 25 | Urban | Northern     | City worker           | Relapse                   | Enrolled     |                                |
| 376 | Male  | 32 | Rural | Southern     | Farmer                | Retreatment failure       | Enrolled     |                                |
| 377 | Male  | 55 | Rural | Northern     | Farmer                | Smear+ after 3 ms         | Enrolled     |                                |
| 378 | Male  | 59 | Urban | Northern     | City worker           | Relapse                   | Enrolled     |                                |
| 379 | Male  | 21 | Urban | Central      | Unemployed/unreported | Relapse                   | Enrolled     |                                |
| 380 | Male  | 20 | Rural | Central      | Retired/Student       | Retreatment failure       | Not enrolled | Concern about work and studies |
| 381 | Male  | 50 | Rural | Northern     | Farmer                | Retreatment failure       | Enrolled     |                                |
| 382 | Male  | 25 | Rural | Northern     | Farmer                | Relapse                   | Enrolled     |                                |
| 383 | Male  | 60 | Rural | Central      | Farmer                | Retreatment failure       | Not enrolled | Out-migration                  |
| 384 | Femal | 51 | Rural | Northern     | Farmer                | Retreatment failure       | Enrolled     |                                |
| 385 | Femal | 32 | Rural | Southern     | Farmer                | Initial treatment failure | Not enrolled | Death                          |
| 386 | Male  | 31 | Rural | Southwestern | Farmer                | Retreatment failure       | Not enrolled | Death                          |
| 387 | Male  | 54 | Rural | Central      | Farmer                | Initial treatment failure | Enrolled     |                                |
| 388 | Male  | 42 | Rural | Central      | Farmer                | New                       | Not enrolled | Out-migration                  |
| 389 | Male  | 23 | Rural | Northern     | Farmer                | New                       | Enrolled     |                                |
| 390 | Male  | 51 | Rural | Northern     | Farmer                | New                       | Not enrolled | Out-migration                  |
| 391 | Femal | 39 | Rural | Southern     | Farmer                | Initial treatment failure | Not enrolled | Out-migration                  |
| 392 | Femal | 54 | Rural | Northern     | Farmer                | Relapse                   | Enrolled     |                                |
| 393 | Male  | 41 | Urban | Southern     | Unemployed/unreported | Relapse                   | Enrolled     |                                |
| 394 | Male  | 41 | Rural | Northern     | Farmer                | Relapse                   | Enrolled     |                                |
| 395 | Male  | 56 | Rural | Northern     | Farmer                | New                       | Enrolled     |                                |
| 396 | Male  | 42 | Urban | Northern     | City worker           | New                       | Enrolled     |                                |
| 397 | Male  | 59 | Rural | Southwestern | Farmer                | Retreatment failure       | Enrolled     |                                |
| 398 | Male  | 45 | Urban | Central      | Unemployed/unreported | New                       | Enrolled     |                                |
| 399 | Male  | 40 | Rural | Southern     | Farmer                | Relapse                   | Not enrolled | Out-migration                  |
| 400 | Male  | 30 | Rural | Southern     | Farmer                | Relapse                   | Enrolled     |                                |
| 401 | Femal | 28 | Rural | Central      | Farmer                | Initial treatment failure | Enrolled     |                                |
| 402 | Male  | 59 | Rural | Southwestern | Farmer                | Retreatment failure       | Enrolled     |                                |
| 403 | Male  | 30 | Rural | Southern     | Farmer                | New                       | Enrolled     |                                |
| 404 | Male  | 55 | Rural | Northern     | Farmer                | Relapse                   | Enrolled     |                                |
| 405 | Male  | 37 | Urban | Northern     | City worker           | Retreatment failure       | Enrolled     |                                |
| 406 | Male  | 57 | Rural | Northern     | Farmer                | Retreatment failure       | Enrolled     |                                |
| 407 | Male  | 51 | Rural | Northern     | Farmer                | New                       | Enrolled     |                                |
| 408 | Femal | 66 | Rural | Northern     | Farmer                | Relapse                   | Enrolled     |                                |
| 409 | Male  | 31 | Rural | Northern     | Farmer                | Retreatment failure       | Not enrolled | Economic hardship              |
| 410 | Femal | 36 | Rural | Northern     | Farmer                | Retreatment failure       | Enrolled     |                                |
| 411 | Male  | 22 | Rural | Northern     | Farmer                | Retreatment failure       | Not enrolled | Non-standard treatment         |
| 412 | Male  | 60 | Urban | Southwestern | City worker           | Relapse                   | Enrolled     |                                |
| 413 | Male  | 40 | Urban | Northern     | City worker           | Retreatment failure       | Enrolled     |                                |
| 414 | Femal | 64 | Rural | Central      | Farmer                | Retreatment failure       | Enrolled     |                                |
| 415 | Male  | 48 | Rural | Central      | Farmer                | Relapse                   | Enrolled     |                                |
| 416 | Male  | 63 | Rural | Central      | Farmer                | New                       | Enrolled     |                                |
| 417 | Male  | 61 | Rural | Southern     | Farmer                | Retreatment failure       | Enrolled     |                                |
| 418 | Male  | 53 | Rural | Western      | Farmer                | Retreatment failure       | Enrolled     |                                |
| 419 | Male  | 43 | Urban | Southern     | Unemployed/unreported | Retreatment failure       | Not enrolled | Death                          |
| 420 | Femal | 28 | Rural | Northern     | Farmer                | Retreatment failure       | Enrolled     |                                |
| 421 | Male  | 19 | Urban | Northern     | Retired/Student       | Retreatment failure       | Enrolled     |                                |
| 422 | Male  | 39 | Urban | Southern     | City worker           | Retreatment failure       | Enrolled     |                                |
| 423 | Male  | 40 | Rural | Central      | Farmer                | New                       | Enrolled     |                                |
| 424 | Femal | 34 | Rural | Northern     | Farmer                | Retreatment failure       | Not enrolled | studies                        |

|     |       |    |       |              |                       |                           |              |                        |
|-----|-------|----|-------|--------------|-----------------------|---------------------------|--------------|------------------------|
| 425 | Femal | 38 | Rural | Central      | Farmer                | Retreatment failure       | Enrolled     |                        |
| 426 | Male  | 43 | Urban | Northern     | City worker           | Retreatment failure       | Enrolled     |                        |
| 427 | Femal | 55 | Rural | Unknown      | Farmer                | Smear+ after 3 ms         | Not enrolled | Unknown address        |
| 428 | Male  | 58 | Rural | Northern     | Farmer                | Relapse                   | Not enrolled | Economic hardship      |
| 429 | Femal | 35 | Rural | Southern     | Farmer                | Retreatment failure       | Enrolled     |                        |
| 430 | Femal | 48 | Rural | Northern     | Farmer                | Retreatment failure       | Enrolled     |                        |
| 431 | Femal | 18 | Urban | Western      | Retired/Student       | New                       | Not enrolled | Economic hardship      |
| 432 | Male  | 27 | Rural | Southern     | Farmer                | Return or other           | Not enrolled | Out-migration          |
| 433 | Femal | 37 | Rural | Southern     | Farmer                | Relapse                   | Enrolled     |                        |
| 434 | Male  | 47 | Urban | Southern     | City worker           | New                       | Enrolled     |                        |
| 435 | Male  | 51 | Rural | Northern     | Farmer                | New                       | Enrolled     |                        |
| 436 | Male  | 55 | Urban | Northern     | City worker           | Retreatment failure       | Enrolled     |                        |
| 437 | Male  | 64 | Rural | Southwestern | Farmer                | New                       | Not enrolled | Out-migration          |
| 438 | Femal | 35 | Rural | Southwestern | Farmer                | Retreatment failure       | Enrolled     |                        |
| 439 | Male  | 47 | Rural | Southern     | Farmer                | Relapse                   | Not enrolled | Non-standard treatment |
| 440 | Femal | 59 | Rural | Southwestern | Farmer                | New                       | Not enrolled | Death                  |
| 441 | Femal | 33 | Urban | Northern     | Unemployed/unreported | Relapse                   | Enrolled     |                        |
| 442 | Male  | 46 | Rural | Central      | Farmer                | Initial treatment failure | Enrolled     |                        |
| 443 | Male  | 27 | Rural | Southwestern | Farmer                | Relapse                   | Enrolled     |                        |
| 444 | Male  | 42 | Rural | Southern     | City worker           | Relapse                   | Enrolled     |                        |
| 445 | Male  | 38 | Urban | Northern     | City worker           | Retreatment failure       | Enrolled     |                        |
| 446 | Male  | 41 | Urban | Central      | City worker           | New                       | Enrolled     |                        |
| 447 | Male  | 40 | Rural | Northern     | Farmer                | Retreatment failure       | Enrolled     |                        |
| 448 | Male  | 29 | Urban | Southwestern | City worker           | Retreatment failure       | Enrolled     |                        |
| 449 | Male  | 75 | Rural | Southwestern | Farmer                | Retreatment failure       | Not enrolled | Other severe disease   |
| 450 | Male  | 25 | Rural | Central      | Farmer                | New                       | Not enrolled | Out-migration          |
| 451 | Femal | 24 | Urban | Northern     | City worker           | Retreatment failure       | Enrolled     |                        |
| 452 | Male  | 51 | Rural | Central      | Farmer                | Retreatment failure       | Enrolled     |                        |
| 453 | Male  | 51 | Rural | Central      | Farmer                | New                       | Enrolled     |                        |
| 454 | Male  | 41 | Rural | Southwestern | Farmer                | Retreatment failure       | Enrolled     |                        |
| 455 | Male  | 35 | Rural | Central      | City worker           | Retreatment failure       | Enrolled     |                        |
| 456 | Male  | 48 | Rural | Northern     | Farmer                | Relapse                   | Not enrolled | Belief of being cured  |
| 457 | Male  | 60 | Rural | Southern     | Farmer                | New                       | Not enrolled | Economic hardship      |
| 458 | Male  | 52 | Rural | Western      | Farmer                | Retreatment failure       | Enrolled     |                        |
| 459 | Male  | 58 | Urban | Central      | City worker           | Relapse                   | Enrolled     |                        |
| 460 | Male  | 46 | Rural | Southwestern | Farmer                | Relapse                   | Enrolled     |                        |
| 461 | Male  | 40 | Rural | Northern     | Farmer                | Relapse                   | Enrolled     |                        |
| 462 | Male  | 52 | Rural | Southern     | Farmer                | Retreatment failure       | Enrolled     |                        |
| 463 | Male  | 35 | Rural | Northern     | Farmer                | Retreatment failure       | Enrolled     |                        |
| 464 | Male  | 24 | Rural | Southwestern | Farmer                | Retreatment failure       | Enrolled     |                        |
| 465 | Male  | 56 | Rural | Northern     | Farmer                | Retreatment failure       | Enrolled     |                        |
| 466 | Male  | 48 | Rural | Northern     | Farmer                | Relapse                   | Not enrolled | Out-migration          |
| 467 | Male  | 32 | Rural | Northern     | Farmer                | Retreatment failure       | Enrolled     |                        |
| 468 | Male  | 42 | Rural | Southwestern | Farmer                | Retreatment failure       | Enrolled     |                        |
| 469 | Male  | 29 | Rural | Southwestern | Farmer                | Retreatment failure       | Enrolled     |                        |
| 470 | Femal | 33 | Urban | Northern     | Unemployed/unreported | New                       | Not enrolled | Out-migration          |
| 471 | Male  | 46 | Rural | Unknown      | Farmer                | Retreatment failure       | Not enrolled | Unknown address        |
| 472 | Male  | 52 | Rural | Southwestern | Farmer                | Retreatment failure       | Not enrolled | Economic hardship      |
| 473 | Male  | 24 | Urban | Northern     | City worker           | New                       | Enrolled     |                        |
| 474 | Male  | 41 | Rural | Southwestern | Farmer                | New                       | Enrolled     |                        |
| 475 | Femal | 28 | Rural | Southern     | Farmer                | Retreatment failure       | Enrolled     |                        |
| 476 | Femal | 23 | Rural | Southwestern | Farmer                | New                       | Not enrolled | studies                |
| 477 | Male  | 47 | Rural | Southwestern | Farmer                | Relapse                   | Enrolled     |                        |
| 478 | Male  | 40 | Urban | Southwestern | City worker           | New                       | Enrolled     |                        |
| 479 | Male  | 73 | Rural | Northern     | Farmer                | New                       | Not enrolled | Out-migration          |
| 480 | Male  | 30 | Urban | Central      | City worker           | Retreatment failure       | Enrolled     |                        |
| 481 | Male  | 44 | Urban | Southwestern | City worker           | Retreatment failure       | Enrolled     |                        |
| 482 | Male  | 33 | Rural | Central      | Farmer                | Return or other           | Not enrolled | studies                |
| 483 | Male  | 40 | Rural | Northern     | Farmer                | New                       | Not enrolled | Out-migration          |
| 484 | Male  | 71 | Rural | Southwestern | Farmer                | Retreatment failure       | Enrolled     |                        |
| 485 | Femal | 44 | Rural | Central      | Farmer                | New                       | Not enrolled | Out-migration          |



|     |       |    |       |              |                       |                           |              |                                |
|-----|-------|----|-------|--------------|-----------------------|---------------------------|--------------|--------------------------------|
| 486 | Femal | 81 | Rural | Central      | Farmer                | Relapse                   | Not enrolled | Out-migration                  |
| 487 | Male  | 28 | Rural | Southwestern | Farmer                | Retreatment failure       | Enrolled     |                                |
| 488 | Male  | 21 | Rural | Unknown      | Farmer                | Retreatment failure       | Not enrolled | Unknown address                |
| 489 | Male  | 56 | Rural | Central      | Farmer                | Retreatment failure       | Enrolled     |                                |
| 490 | Male  | 56 | Rural | Northern     | Farmer                | Relapse                   | Enrolled     |                                |
| 491 | Male  | 70 | Rural | Central      | Farmer                | Retreatment failure       | Enrolled     |                                |
| 492 | Male  | 54 | Rural | Northern     | Farmer                | New                       | Not enrolled | Out-migration                  |
| 493 | Male  | 62 | Rural | Southwestern | Farmer                | Relapse                   | Not enrolled | Out-migration                  |
| 494 | Male  | 66 | Rural | Western      | Farmer                | Retreatment failure       | Not enrolled | Economic hardship              |
| 495 | Femal | 30 | Urban | Western      | City worker           | Retreatment failure       | Enrolled     |                                |
| 496 | Male  | 44 | Rural | Northern     | Farmer                | New                       | Enrolled     |                                |
| 497 | Femal | 34 | Rural | Western      | Farmer                | Retreatment failure       | Enrolled     |                                |
| 498 | Male  | 26 | Rural | Southwestern | Farmer                | New                       | Enrolled     |                                |
| 499 | Male  | 22 | Rural | Southwestern | Farmer                | Relapse                   | Not enrolled | Non-standard treatment         |
| 500 | Male  | 73 | Rural | Northern     | Farmer                | Retreatment failure       | Not enrolled | Other severe disease           |
| 501 | Male  | 64 | Rural | Western      | Farmer                | Retreatment failure       | Enrolled     |                                |
| 502 | Male  | 74 | Urban | Central      | Retired/Student       | Relapse                   | Enrolled     |                                |
| 503 | Femal | 54 | Rural | Southwestern | Farmer                | New                       | Not enrolled | Out-migration                  |
| 504 | Femal | 58 | Rural | Southern     | Farmer                | Initial treatment failure | Enrolled     |                                |
| 505 | Femal | 49 | Rural | Central      | Farmer                | Retreatment failure       | Enrolled     |                                |
| 506 | Femal | 46 | Urban | Southwestern | City worker           | Retreatment failure       | Enrolled     |                                |
| 507 | Femal | 40 | Rural | Southern     | Farmer                | Smear+ after 3 ms         | Enrolled     |                                |
| 508 | Male  | 36 | Rural | Western      | Farmer                | Retreatment failure       | Enrolled     |                                |
| 509 | Male  | 46 | Rural | Southwestern | Farmer                | New                       | Not enrolled | Out-migration                  |
| 510 | Male  | 47 | Rural | Northern     | Farmer                | Retreatment failure       | Enrolled     |                                |
| 511 | Male  | 44 | Rural | Southern     | Farmer                | Retreatment failure       | Enrolled     |                                |
| 512 | Male  | 43 | Urban | Central      | City worker           | New                       | Enrolled     |                                |
| 513 | Male  | 78 | Rural | Central      | Farmer                | Retreatment failure       | Not enrolled | Out-migration                  |
| 514 | Male  | 33 | Urban | Central      | City worker           | New                       | Enrolled     |                                |
| 515 | Male  | 60 | Rural | Central      | Farmer                | New                       | Not enrolled | Out-migration                  |
| 516 | Femal | 48 | Rural | Northern     | Farmer                | Retreatment failure       | Not enrolled | studies                        |
| 517 | Male  | 47 | Rural | Southwestern | Farmer                | New                       | Not enrolled | Economic hardship              |
| 518 | Male  | 42 | Rural | Southern     | Farmer                | Initial treatment failure | Enrolled     |                                |
| 519 | Male  | 24 | Rural | Northern     | Farmer                | Retreatment failure       | Enrolled     |                                |
| 520 | Femal | 36 | Rural | Central      | Farmer                | Retreatment failure       | Enrolled     |                                |
| 521 | Male  | 37 | Rural | Western      | Farmer                | Retreatment failure       | Enrolled     |                                |
| 522 | Femal | 41 | Rural | Southern     | Farmer                | New                       | Enrolled     |                                |
| 523 | Femal | 48 | Rural | Northern     | Farmer                | Initial treatment failure | Not enrolled | Concern about work and studies |
| 524 | Male  | 58 | Rural | Southern     | Farmer                | Retreatment failure       | Enrolled     |                                |
| 525 | Male  | 47 | Urban | Southwestern | City worker           | Initial treatment failure | Enrolled     |                                |
| 526 | Male  | 44 | Rural | Northern     | Farmer                | Retreatment failure       | Not enrolled | Non-standard treatment         |
| 527 | Male  | 74 | Rural | Central      | Farmer                | Retreatment failure       | Not enrolled | Other severe disease           |
| 528 | Male  | 51 | Rural | Southern     | Farmer                | Retreatment failure       | Enrolled     |                                |
| 529 | Male  | 36 | Rural | Central      | Farmer                | New                       | Not enrolled | Out-migration                  |
| 530 | Male  | 23 | Rural | Central      | Farmer                | Relapse                   | Enrolled     |                                |
| 531 | Male  | 50 | Rural | Southern     | Farmer                | New                       | Not enrolled | Non-standard treatment         |
| 532 | Male  | 48 | Rural | Central      | Farmer                | Retreatment failure       | Not enrolled | Concern about work and studies |
| 533 | Male  | 33 | Rural | Western      | Farmer                | Initial treatment failure | Enrolled     |                                |
| 534 | Femal | 26 | Urban | Southern     | Unemployed/unreported | Relapse                   | Enrolled     |                                |
| 535 | Femal | 26 | Rural | Southern     | Farmer                | Relapse                   | Enrolled     |                                |
| 536 | Femal | 42 | Urban | Southern     | Unemployed/unreported | Relapse                   | Not enrolled | studies                        |
| 537 | Male  | 57 | Rural | Northern     | Farmer                | Retreatment failure       | Enrolled     |                                |
| 538 | Male  | 56 | Rural | Northern     | Farmer                | Retreatment failure       | Enrolled     |                                |
| 539 | Male  | 19 | Urban | Central      | City worker           | Relapse                   | Enrolled     |                                |
| 540 | Male  | 65 | Rural | Central      | Farmer                | Retreatment failure       | Enrolled     |                                |
| 541 | Male  | 26 | Rural | Central      | Farmer                | Retreatment failure       | Enrolled     |                                |
| 542 | Male  | 45 | Rural | Northern     | Farmer                | Retreatment failure       | Not enrolled | Out-migration                  |
| 543 | Femal | 24 | Rural | Northern     | Farmer                | Retreatment failure       | Not enrolled | Non-standard treatment         |
| 544 | Male  | 50 | Rural | Southwestern | Farmer                | Retreatment failure       | Enrolled     |                                |
| 545 | Male  | 22 | Rural | Central      | Farmer                | Retreatment failure       | Not enrolled | Non-standard treatment         |
| 546 | Male  | 57 | Rural | Central      | Farmer                | Retreatment failure       | Enrolled     |                                |

|     |       |    |       |                |                       |                           |              |                        |
|-----|-------|----|-------|----------------|-----------------------|---------------------------|--------------|------------------------|
| 547 | Femal | 29 | Rural | Central        | Farmer                | Retreatment failure       | Enrolled     |                        |
| 548 | Male  | 55 | Rural | Central        | Farmer                | Initial treatment failure | Enrolled     |                        |
| 549 | Male  | 55 | Rural | Central        | Farmer                | Relapse                   | Not enrolled | Economic hardship      |
| 550 | Femal | 24 | Rural | Southern       | Farmer                | Retreatment failure       | Enrolled     |                        |
| 551 | Femal | 48 | Rural | Southwestern   | Farmer                | Relapse                   | Enrolled     |                        |
| 552 | Femal | 33 | Rural | Central        | Farmer                | Relapse                   | Not enrolled | Economic hardship      |
| 553 | Femal | 33 | Urban | Central        | City worker           | Retreatment failure       | Enrolled     |                        |
| 554 | Male  | 50 | Rural | Northern       | Farmer                | New                       | Enrolled     |                        |
| 555 | Male  | 35 | Rural | Southwestern   | Farmer                | Relapse                   | Enrolled     |                        |
| 556 | Femal | 43 | Rural | Northern       | Farmer                | New                       | Not enrolled | Out-migration          |
| 557 | Male  | 27 | Rural | Southwestern   | Farmer                | Initial treatment failure | Enrolled     |                        |
| 558 | Femal | 19 | Rural | Southern       | Retired/Student       | Relapse                   | Enrolled     |                        |
| 559 | Male  | 50 | Rural | Central        | Farmer                | Retreatment failure       | Enrolled     |                        |
| 560 | Male  | 76 | Rural | Northern       | Farmer                | Retreatment failure       | Not enrolled | Death                  |
| 561 | Femal | 41 | Rural | Unknown        | Farmer                | Retreatment failure       | Not enrolled | Unknown address        |
| 562 | Male  | 48 | Rural | Central        | Farmer                | Retreatment failure       | Not enrolled | Out-migration          |
| 563 | Male  | 52 | Rural | Central        | Farmer                | Retreatment failure       | Not enrolled | Economic hardship      |
| 564 | Femal | 39 | Rural | Central        | Farmer                | Retreatment failure       | Enrolled     |                        |
| 565 | Femal | 36 | Rural | Unknown        | Farmer                | Initial treatment failure | Not enrolled | Unknown address        |
| 566 | Male  | 41 | Rural | Unknown        | Farmer                | Relapse                   | Not enrolled | Unknown address        |
| 567 | Femal | 35 | Rural | Southern       | Farmer                | Relapse                   | Enrolled     |                        |
| 568 | Male  | 24 | Rural | Southwestern   | Farmer                | Initial treatment failure | Enrolled     |                        |
| 569 | Femal | 39 | Rural | Southern       | Farmer                | Retreatment failure       | Enrolled     |                        |
| 570 | Male  | 36 | Rural | Northern       | Farmer                | Relapse                   | Not enrolled | studies                |
| 571 | Male  | 44 | Urban | Southwestern   | City worker           | Relapse                   | Enrolled     |                        |
| 572 | Male  | 62 | Rural | Central        | Farmer                | Relapse                   | Enrolled     |                        |
| 573 | Male  | 50 | Rural | Southern       | Farmer                | Initial treatment failure | Enrolled     |                        |
| 574 | Femal | 29 | Rural | Northern       | Farmer                | Relapse                   | Not enrolled | Non-standard treatment |
| 575 | Male  | 63 | Rural | Central        | Farmer                | New                       | Not enrolled | Economic hardship      |
| 576 | Male  | 37 | Urban | Southwestern   | Unemployed/unreported | Retreatment failure       | Enrolled     |                        |
| 577 | Femal | 39 | Rural | Northern       | Farmer                | Relapse                   | Enrolled     |                        |
| 578 | Male  | 56 | Rural | Southwestern   | Farmer                | Smear+ after 3 ms         | Enrolled     |                        |
| 579 | Male  | 31 | Rural | Unknown        | Farmer                | Relapse                   | Not enrolled | Unknown address        |
| 580 | Male  | 44 | Rural | Southwestern   | Farmer                | Retreatment failure       | Enrolled     |                        |
| 581 | Femal | 40 | Rural | Northern       | Farmer                | Relapse                   | Enrolled     |                        |
| 582 | Male  | 44 | Rural | Southern       | Farmer                | Retreatment failure       | Enrolled     |                        |
| 583 | Male  | 54 | Rural | Southern       | Farmer                | New                       | Not enrolled | Death                  |
| 584 | Male  | 49 | Rural | Central        | Farmer                | Relapse                   | Not enrolled | Out-migration          |
| 585 | Male  | 76 | Rural | Southern       | Farmer                | New                       | Enrolled     |                        |
| 586 | Femal | 63 | Rural | Central        | Farmer                | New                       | Not enrolled | Death                  |
| 587 | Femal | 38 | Rural | Northern       | Farmer                | Retreatment failure       | Not enrolled | studies                |
| 588 | Femal | 25 | Rural | Central        | Farmer                | Relapse                   | Not enrolled | Out-migration          |
| 589 | Male  | 41 | Rural | Central        | Farmer                | Retreatment failure       | Enrolled     |                        |
| 590 | Male  | 59 | Rural | Western        | Farmer                | Retreatment failure       | Enrolled     |                        |
| 591 | Femal | 44 | Rural | Northern       | Farmer                | Retreatment failure       | Enrolled     |                        |
| 592 | Male  | 58 | Rural | Central        | Farmer                | Relapse                   | Enrolled     |                        |
| 593 | Male  | 31 | Urban | Southern       | City worker           | Retreatment failure       | Enrolled     |                        |
| 594 | Male  | 60 | Rural | Central        | Farmer                | New                       | Enrolled     |                        |
| 595 | Male  | 60 | Rural | Western        | Farmer                | New                       | Not enrolled | Economic hardship      |
| 596 | Male  | 39 | Rural | Southwestern   | Farmer                | Retreatment failure       | Enrolled     |                        |
| 597 | Femal | 41 | Rural | Southern       | Farmer                | Return or other           | Enrolled     |                        |
| 598 | Femal | 41 | Urban | Southwestern   | Unemployed/unreported | Relapse                   | Not enrolled | Out-migration          |
| 599 | Male  | 40 | Rural | Northern       | Farmer                | Retreatment failure       | Enrolled     |                        |
| 600 | Femal | 59 | Urban | Southern       | City worker           | Retreatment failure       | Enrolled     |                        |
| 601 | Male  | 38 | Rural | Other province | Farmer                | Retreatment failure       | Enrolled     |                        |
| 602 | Male  | 40 | Rural | Southwestern   | Farmer                | Retreatment failure       | Enrolled     |                        |
| 603 | Femal | 23 | Rural | Southern       | Farmer                | New                       | Not enrolled | Death                  |
| 604 | Male  | 32 | Rural | Unknown        | Farmer                | Retreatment failure       | Enrolled     |                        |
| 605 | Femal | 31 | Rural | Southwestern   | Farmer                | Retreatment failure       | Not enrolled | Out-migration          |
| 606 | Male  | 55 | Urban | Southwestern   | City worker           | Retreatment failure       | Enrolled     |                        |
| 607 | Femal | 51 | Rural | Southwestern   | Farmer                | Retreatment failure       | Enrolled     |                        |

|     |        |    |       |              |                       |                           |              |                                |
|-----|--------|----|-------|--------------|-----------------------|---------------------------|--------------|--------------------------------|
| 608 | Male   | 49 | Rural | Central      | Farmer                | Relapse                   | Enrolled     |                                |
| 609 | Male   | 48 | Rural | Southern     | Farmer                | Initial treatment failure | Not enrolled | Out-migration                  |
| 610 | Male   | 81 | Rural | Central      | Farmer                | Relapse                   | Not enrolled | Out-migration                  |
| 611 | Male   | 73 | Rural | Southern     | Farmer                | Relapse                   | Enrolled     |                                |
| 612 | Male   | 60 | Rural | Southern     | Farmer                | Retreatment failure       | Enrolled     |                                |
| 613 | Female | 55 | Rural | Southwestern | Farmer                | Relapse                   | Enrolled     |                                |
| 614 | Male   | 34 | Urban | Southwestern | City worker           | Retreatment failure       | Enrolled     |                                |
| 615 | Male   | 49 | Rural | Central      | Farmer                | Retreatment failure       | Not enrolled | Economic hardship              |
| 616 | Male   | 40 | Rural | Southwestern | Farmer                | Relapse                   | Not enrolled | studies                        |
| 617 | Male   | 33 | Urban | Northern     | Unemployed/unreported | Initial treatment failure | Not enrolled | studies                        |
| 618 | Male   | 23 | Rural | Northern     | Farmer                | New                       | Enrolled     |                                |
| 619 | Male   | 83 | Rural | Central      | Farmer                | Relapse                   | Not enrolled | Out-migration                  |
| 620 | Male   | 62 | Rural | Southwestern | Farmer                | New                       | Not enrolled | Death                          |
| 621 | Male   | 48 | Rural | Southwestern | Farmer                | Relapse                   | Not enrolled | Out-migration                  |
| 622 | Male   | 52 | Rural | Unknown      | Farmer                | New                       | Not enrolled | Unknown address                |
| 623 | Male   | 55 | Rural | Central      | Farmer                | Retreatment failure       | Enrolled     |                                |
| 624 | Male   | 69 | Rural | Southwestern | Farmer                | Retreatment failure       | Not enrolled | Economic hardship              |
| 625 | Female | 25 | Rural | Northern     | Farmer                | Relapse                   | Not enrolled | Out-migration                  |
| 626 | Female | 25 | Rural | Northern     | Farmer                | Retreatment failure       | Enrolled     |                                |
| 627 | Male   | 50 | Rural | Southwestern | Farmer                | Retreatment failure       | Enrolled     |                                |
| 628 | Male   | 41 | Rural | Southwestern | Farmer                | Relapse                   | Enrolled     |                                |
| 629 | Female | 25 | Rural | Western      | Farmer                | Retreatment failure       | Enrolled     |                                |
| 630 | Male   | 63 | Rural | Northern     | Farmer                | Retreatment failure       | Not enrolled | studies                        |
| 631 | Male   | 59 | Rural | Northern     | Farmer                | Retreatment failure       | Enrolled     |                                |
| 632 | Female | 21 | Rural | Western      | Farmer                | Retreatment failure       | Enrolled     |                                |
| 633 | Male   | 25 | Rural | Southwestern | Farmer                | Relapse                   | Enrolled     |                                |
| 634 | Male   | 33 | Rural | Southwestern | Farmer                | Retreatment failure       | Enrolled     |                                |
| 635 | Female | 43 | Rural | Western      | Farmer                | Retreatment failure       | Not enrolled | Non-standard treatment         |
| 636 | Male   | 45 | Rural | Central      | Farmer                | Initial treatment failure | Not enrolled | Concern about work and studies |
| 637 | Male   | 50 | Rural | Northern     | Farmer                | Initial treatment failure | Not enrolled | Out-migration                  |
| 638 | Female | 32 | Rural | Central      | Farmer                | New                       | Not enrolled | Belief of being cured          |
| 639 | Female | 30 | Rural | Southern     | Farmer                | Retreatment failure       | Enrolled     |                                |
| 640 | Female | 30 | Rural | Southwestern | Farmer                | Retreatment failure       | Enrolled     |                                |
| 641 | Male   | 69 | Urban | Central      | Retired/Student       | Relapse                   | Not enrolled | Other severe disease           |
| 642 | Female | 27 | Rural | Northern     | Farmer                | New                       | Not enrolled | Belief of being cured          |
| 643 | Male   | 64 | Rural | Northern     | Farmer                | Relapse                   | Not enrolled | studies                        |
| 644 | Male   | 47 | Urban | Central      | City worker           | Initial treatment failure | Enrolled     |                                |
| 645 | Male   | 26 | Rural | Northern     | Farmer                | Retreatment failure       | Enrolled     |                                |
| 646 | Female | 25 | Rural | Central      | Farmer                | Relapse                   | Not enrolled | Out-migration                  |
| 647 | Male   | 39 | Rural | Southern     | Farmer                | Retreatment failure       | Enrolled     |                                |
| 648 | Female | 26 | Rural | Central      | Farmer                | Retreatment failure       | Enrolled     |                                |
| 649 | Male   | 47 | Rural | Northern     | Farmer                | Relapse                   | Enrolled     |                                |
| 650 | Male   | 20 | Rural | Northern     | Retired/Student       | Initial treatment failure | Enrolled     |                                |
| 651 | Male   | 50 | Rural | Southern     | Farmer                | New                       | Not enrolled | Non-standard treatment         |
| 652 | Male   | 20 | Rural | Central      | Retired/Student       | Relapse                   | Enrolled     |                                |
| 653 | Male   | 24 | Urban | Western      | Retired/Student       | Relapse                   | Not enrolled | Concern about work and studies |
| 654 | Female | 38 | Rural | Southwestern | Farmer                | Retreatment failure       | Enrolled     |                                |
| 655 | Female | 36 | Urban | Southwestern | Unemployed/unreported | New                       | Enrolled     |                                |
| 656 | Female | 36 | Rural | Southwestern | Farmer                | Relapse                   | Enrolled     |                                |
| 657 | Female | 47 | Rural | Southwestern | Farmer                | Retreatment failure       | Enrolled     |                                |
| 658 | Male   | 52 | Rural | Southern     | Farmer                | New                       | Not enrolled | Economic hardship              |
| 659 | Male   | 45 | Rural | Central      | Farmer                | New                       | Not enrolled | Belief of being cured          |
| 660 | Male   | 26 | Urban | Southwestern | City worker           | Retreatment failure       | Enrolled     |                                |
| 661 | Female | 49 | Rural | Western      | Farmer                | Retreatment failure       | Enrolled     |                                |
| 662 | Female | 26 | Rural | Southwestern | Farmer                | New                       | Enrolled     |                                |
| 663 | Male   | 48 | Rural | Northern     | Farmer                | Retreatment failure       | Enrolled     |                                |
| 664 | Male   | 47 | Rural | Central      | Farmer                | Retreatment failure       | Enrolled     |                                |
| 665 | Male   | 48 | Rural | Central      | City worker           | Relapse                   | Enrolled     |                                |
| 666 | Male   | 57 | Urban | Northern     | Unemployed/unreported | Retreatment failure       | Enrolled     |                                |
| 667 | Female | 26 | Rural | Southwestern | Farmer                | Relapse                   | Enrolled     |                                |
| 668 | Male   | 54 | Rural | Central      | Farmer                | New                       | Enrolled     |                                |

|     |       |    |       |              |                       |                          |              |                       |
|-----|-------|----|-------|--------------|-----------------------|--------------------------|--------------|-----------------------|
| 669 | Femal | 60 | Rural | Central      | Farmer                | Retreatment failure      | Not enrolled | Out-migration         |
| 670 | Femal | 27 | Rural | Northern     | Farmer                | Relapse                  | Enrolled     |                       |
| 671 | Male  | 28 | Rural | Southwestern | Farmer                | Retreatment failure      | Not enrolled | Out-migration         |
| 672 | Male  | 57 | Rural | Central      | Farmer                | Retreatment failure      | Enrolled     |                       |
| 673 | Male  | 48 | Rural | Southwestern | Farmer                | Retreatment failure      | Enrolled     |                       |
| 674 | Male  | 54 | Rural | Western      | Farmer                | New                      | Not enrolled | Death                 |
| 675 | Male  | 62 | Urban | Southwestern | Unemployed/unreported | New                      | Not enrolled | Economic hardship     |
| 676 | Male  | 51 | Rural | Central      | Farmer                | Smear+ after 3 ms        | Enrolled     |                       |
| 677 | Femal | 62 | Rural | Southern     | Farmer                | Relapse                  | Enrolled     |                       |
| 678 | Male  | 43 | Rural | Southwestern | Farmer                | Relapse                  | Enrolled     |                       |
| 679 | Male  | 28 | Rural | Northern     | Farmer                | New                      | Not enrolled | studies               |
| 680 | Male  | 37 | Rural | Southern     | Farmer                | Retreatment failure      | Enrolled     |                       |
| 681 | Male  | 42 | Rural | Southwestern | Farmer                | Retreatment failure      | Enrolled     |                       |
| 682 | Femal | 21 | Rural | Central      | Farmer                | Retreatment failure      | Not enrolled | studies               |
| 683 | Male  | 51 | Urban | Northern     | Unemployed/unreported | Retreatment failure      | Enrolled     |                       |
| 684 | Male  | 41 | Rural | Northern     | Farmer                | Relapse                  | Not enrolled | Economic hardship     |
| 685 | Male  | 45 | Urban | Southwestern | Unemployed/unreported | Relapse                  | Enrolled     |                       |
| 686 | Male  | 85 | Rural | Central      | Farmer                | Retreatment failure      | Enrolled     |                       |
| 687 | Male  | 57 | Rural | Northern     | Farmer                | Retreatment failure      | Enrolled     |                       |
| 688 | Male  | 45 | Rural | Northern     | Farmer                | Initial treatment failur | Enrolled     |                       |
| 689 | Femal | 63 | Rural | Northern     | Farmer                | Relapse                  | Enrolled     |                       |
| 690 | Femal | 65 | Rural | Central      | Farmer                | Retreatment failure      | Enrolled     |                       |
| 691 | Male  | 46 | Urban | Southwestern | Unemployed/unreported | Retreatment failure      | Not enrolled | Economic hardship     |
| 692 | Male  | 43 | Urban | Southwestern | City worker           | Retreatment failure      | Enrolled     |                       |
| 693 | Femal | 67 | Rural | Northern     | Farmer                | Retreatment failure      | Enrolled     |                       |
| 694 | Femal | 27 | Rural | Southwestern | Farmer                | Relapse                  | Not enrolled | Out-migration         |
| 695 | Male  | 72 | Urban | Northern     | Retired/Student       | Relapse                  | Enrolled     |                       |
| 696 | Femal | 28 | Rural | Central      | Farmer                | New                      | Not enrolled | Out-migration         |
| 697 | Femal | 30 | Rural | Northern     | Farmer                | Retreatment failure      | Not enrolled | Out-migration         |
| 698 | Male  | 38 | Rural | Southwestern | Farmer                | Retreatment failure      | Enrolled     |                       |
| 699 | Male  | 65 | Rural | Northern     | Farmer                | Retreatment failure      | Enrolled     |                       |
| 700 | Femal | 43 | Urban | Southwestern | Unemployed/unreported | Relapse                  | Not enrolled | Out-migration         |
| 701 | Femal | 75 | Rural | Southwestern | Farmer                | New                      | Not enrolled | Economic hardship     |
| 702 | Femal | 28 | Rural | Southwestern | Farmer                | Retreatment failure      | Enrolled     |                       |
| 703 | Femal | 82 | Rural | Southern     | Farmer                | Relapse                  | Not enrolled | Economic hardship     |
| 704 | Male  | 59 | Rural | Southern     | Farmer                | Relapse                  | Enrolled     |                       |
| 705 | Male  | 47 | Rural | Northern     | Farmer                | Retreatment failure      | Enrolled     |                       |
| 706 | Male  | 26 | Urban | Southwestern | Unemployed/unreported | Retreatment failure      | Enrolled     |                       |
| 707 | Male  | 37 | Rural | Southwestern | Farmer                | Relapse                  | Enrolled     |                       |
| 708 | Femal | 39 | Rural | Southern     | Farmer                | Relapse                  | Enrolled     |                       |
| 709 | Femal | 50 | Rural | Southern     | Farmer                | Retreatment failure      | Not enrolled | Belief of being cured |
| 710 | Femal | 43 | Urban | Southwestern | City worker           | Retreatment failure      | Enrolled     |                       |
| 711 | Male  | 29 | Rural | Southwestern | Farmer                | Retreatment failure      | Enrolled     |                       |
| 712 | Male  | 50 | Rural | Southern     | Farmer                | Retreatment failure      | Enrolled     |                       |
| 713 | Male  | 46 | Urban | Southern     | Unemployed/unreported | Retreatment failure      | Enrolled     |                       |
| 714 | Male  | 22 | Rural | Southwestern | Farmer                | Retreatment failure      | Enrolled     |                       |
| 715 | Male  | 40 | Rural | Western      | Farmer                | New                      | Not enrolled | Out-migration         |
| 716 | Male  | 42 | Rural | Southwestern | Farmer                | Retreatment failure      | Enrolled     |                       |
| 717 | Male  | 33 | Rural | Northern     | Farmer                | New                      | Enrolled     |                       |
| 718 | Male  | 49 | Urban | Northern     | City worker           | Retreatment failure      | Enrolled     |                       |
| 719 | Male  | 65 | Rural | Southwestern | Farmer                | Retreatment failure      | Not enrolled | Economic hardship     |
| 720 | Femal | 32 | Rural | Southwestern | Farmer                | Retreatment failure      | Enrolled     |                       |
| 721 | Male  | 54 | Rural | Southern     | Farmer                | Retreatment failure      | Enrolled     |                       |
| 722 | Male  | 41 | Rural | Southwestern | Farmer                | Retreatment failure      | Enrolled     |                       |
| 723 | Male  | 23 | Rural | Southern     | Farmer                | Relapse                  | Enrolled     |                       |
| 724 | Femal | 76 | Rural | Northern     | Farmer                | Retreatment failure      | Not enrolled | Other severe disease  |
| 725 | Male  | 66 | Rural | Central      | Farmer                | Relapse                  | Not enrolled | Economic hardship     |
| 726 | Male  | 47 | Rural | Southwestern | Farmer                | Initial treatment failur | Enrolled     |                       |
| 727 | Male  | 27 | Rural | Southern     | Farmer                | Retreatment failure      | Enrolled     |                       |
| 728 | Male  | 36 | Rural | Unknown      | Farmer                | New                      | Not enrolled | Unknown address       |
| 729 | Femal | 44 | Rural | Northern     | Farmer                | Relapse                  | Enrolled     |                       |

|     |       |    |       |              |                       |                           |              |                                |
|-----|-------|----|-------|--------------|-----------------------|---------------------------|--------------|--------------------------------|
| 730 | Male  | 31 | Rural | Northern     | Farmer                | Relapse                   | Not enrolled | Out-migration                  |
| 731 | Male  | 53 | Rural | Southwestern | Farmer                | Relapse                   | Not enrolled | Economic hardship              |
| 732 | Male  | 43 | Rural | Northern     | Farmer                | Retreatment failure       | Enrolled     |                                |
| 733 | Male  | 69 | Rural | Southwestern | Farmer                | Relapse                   | Not enrolled | Economic hardship              |
| 734 | Femal | 43 | Rural | Southwestern | Farmer                | Relapse                   | Enrolled     |                                |
| 735 | Male  | 49 | Urban | Northern     | Unemployed/unreported | Relapse                   | Enrolled     |                                |
| 736 | Male  | 20 | Rural | Northern     | City worker           | Retreatment failure       | Enrolled     |                                |
| 737 | Male  | 31 | Rural | Central      | Farmer                | Initial treatment failure | Enrolled     |                                |
| 738 | Male  | 33 | Urban | Central      | Unemployed/unreported | Retreatment failure       | Not enrolled | Non-standard treatment         |
| 739 | Male  | 33 | Urban | Southwestern | Unemployed/unreported | New                       | Not enrolled | Non-standard treatment         |
| 740 | Male  | 27 | Rural | Southwestern | Farmer                | New                       | Not enrolled | Out-migration                  |
| 741 | Male  | 34 | Rural | Southwestern | Farmer                | Retreatment failure       | Enrolled     |                                |
| 742 | Male  | 40 | Rural | Central      | Farmer                | Relapse                   | Not enrolled | Out-migration                  |
| 743 | Male  | 42 | Urban | Northern     | City worker           | Retreatment failure       | Enrolled     |                                |
| 744 | Male  | 65 | Rural | Northern     | Farmer                | Relapse                   | Not enrolled | Out-migration                  |
| 745 | Male  | 28 | Rural | Northern     | Farmer                | Retreatment failure       | Enrolled     |                                |
| 746 | Male  | 21 | Rural | Southwestern | Farmer                | New                       | Enrolled     |                                |
| 747 | Male  | 59 | Urban | Central      | City worker           | New                       | Enrolled     |                                |
| 748 | Male  | 49 | Rural | Southwestern | Farmer                | Retreatment failure       | Not enrolled | Economic hardship              |
| 749 | Femal | 32 | Rural | Central      | Farmer                | Retreatment failure       | Enrolled     |                                |
| 750 | Male  | 42 | Rural | Southern     | Farmer                | Retreatment failure       | Enrolled     |                                |
| 751 | Femal | 44 | Rural | Unknown      | Farmer                | Retreatment failure       | Enrolled     |                                |
| 752 | Femal | 22 | Urban | Northern     | City worker           | Retreatment failure       | Enrolled     |                                |
| 753 | Male  | 32 | Rural | Southwestern | Farmer                | Retreatment failure       | Not enrolled | Belief of being cured          |
| 754 | Male  | 54 | Rural | Southern     | Farmer                | Retreatment failure       | Enrolled     |                                |
| 755 | Male  | 58 | Rural | Northern     | Farmer                | Retreatment failure       | Not enrolled | Out-migration                  |
| 756 | Male  | 61 | Rural | Central      | Farmer                | Relapse                   | Not enrolled | Non-standard treatment         |
| 757 | Male  | 83 | Rural | Northern     | Farmer                | Initial treatment failure | Not enrolled | Death                          |
| 758 | Male  | 82 | Rural | Northern     | Farmer                | Retreatment failure       | Enrolled     |                                |
| 759 | Male  | 50 | Rural | Southwestern | Farmer                | Retreatment failure       | Enrolled     |                                |
| 760 | Male  | 51 | Rural | Southwestern | Farmer                | Retreatment failure       | Enrolled     |                                |
| 761 | Male  | 46 | Rural | Northern     | Farmer                | Relapse                   | Not enrolled | Concern about work and studies |
| 762 | Male  | 49 | Urban | Northern     | City worker           | Retreatment failure       | Enrolled     |                                |
| 763 | Male  | 55 | Urban | Central      | City worker           | Retreatment failure       | Enrolled     |                                |
| 764 | Male  | 47 | Rural | Central      | Farmer                | Retreatment failure       | Enrolled     |                                |
| 765 | Male  | 24 | Rural | Southwestern | Farmer                | Retreatment failure       | Not enrolled | Non-standard treatment         |
| 766 | Femal | 76 | Rural | Central      | Farmer                | New                       | Enrolled     |                                |
| 767 | Male  | 54 | Rural | Northern     | Farmer                | Retreatment failure       | Enrolled     |                                |
| 768 | Femal | 49 | Rural | Northern     | Farmer                | Initial treatment failure | Not enrolled | Out-migration                  |
| 769 | Femal | 55 | Rural | Southern     | Farmer                | Retreatment failure       | Enrolled     |                                |
| 770 | Male  | 65 | Rural | Northern     | Farmer                | Retreatment failure       | Enrolled     |                                |
| 771 | Male  | 22 | Rural | Southern     | Farmer                | New                       | Enrolled     |                                |
| 772 | Male  | 61 | Urban | Southwestern | Retired/Student       | New                       | Not enrolled | Economic hardship              |
| 773 | Male  | 64 | Rural | Southwestern | Farmer                | Relapse                   | Enrolled     |                                |
| 774 | Male  | 45 | Rural | Southern     | Farmer                | Retreatment failure       | Enrolled     |                                |
| 775 | Male  | 60 | Rural | Southwestern | Farmer                | Relapse                   | Not enrolled | studies                        |
| 776 | Male  | 27 | Rural | Western      | Farmer                | Relapse                   | Enrolled     |                                |
| 777 | Femal | 24 | Rural | Central      | Farmer                | Relapse                   | Not enrolled | Out-migration                  |
| 778 | Male  | 63 | Rural | Southern     | Farmer                | Retreatment failure       | Enrolled     |                                |
| 779 | Male  | 41 | Urban | Southern     | City worker           | New                       | Enrolled     |                                |
| 780 | Male  | 29 | Rural | Southwestern | Farmer                | Retreatment failure       | Not enrolled | Out-migration                  |
| 781 | Male  | 39 | Rural | Western      | Farmer                | Retreatment failure       | Not enrolled | Death                          |
| 782 | Male  | 31 | Rural | Northern     | Farmer                | Retreatment failure       | Enrolled     |                                |
| 783 | Male  | 47 | Rural | Northern     | Farmer                | Retreatment failure       | Enrolled     |                                |
| 784 | Male  | 47 | Rural | Northern     | Farmer                | Retreatment failure       | Enrolled     |                                |
| 785 | Male  | 46 | Rural | Northern     | Farmer                | New                       | Not enrolled | Out-migration                  |
| 786 | Femal | 25 | Rural | Central      | Farmer                | Retreatment failure       | Enrolled     |                                |
| 787 | Male  | 25 | Urban | Southern     | Unemployed/unreported | Retreatment failure       | Enrolled     |                                |
| 788 | Male  | 48 | Rural | Northern     | Farmer                | Retreatment failure       | Enrolled     |                                |
| 789 | Femal | 20 | Rural | Southwestern | Retired/Student       | Return or other           | Enrolled     |                                |
| 790 | Male  | 40 | Rural | Southwestern | Farmer                | Retreatment failure       | Not enrolled | Concern about work and studies |

|     |       |    |       |              |                       |                           |              |                                |
|-----|-------|----|-------|--------------|-----------------------|---------------------------|--------------|--------------------------------|
| 791 | Male  | 37 | Rural | Western      | Farmer                | Retreatment failure       | Not enrolled | Belief of being cured          |
| 792 | Male  | 48 | Rural | Central      | Farmer                | Retreatment failure       | Enrolled     |                                |
| 793 | Male  | 62 | Rural | Northern     | Farmer                | New                       | Not enrolled | Economic hardship              |
| 794 | Male  | 54 | Rural | Northern     | Farmer                | Retreatment failure       | Enrolled     |                                |
| 795 | Femal | 42 | Rural | Central      | Farmer                | New                       | Enrolled     |                                |
| 796 | Male  | 32 | Rural | Central      | Farmer                | Relapse                   | Enrolled     |                                |
| 797 | Male  | 26 | Rural | Southern     | Farmer                | Retreatment failure       | Enrolled     |                                |
| 798 | Male  | 32 | Rural | Northern     | Farmer                | Retreatment failure       | Enrolled     |                                |
| 799 | Femal | 55 | Rural | Southwestern | Farmer                | Retreatment failure       | Enrolled     |                                |
| 800 | Male  | 52 | Rural | Northern     | Farmer                | Retreatment failure       | Enrolled     |                                |
| 801 | Male  | 25 | Rural | Western      | Farmer                | New                       | Enrolled     |                                |
| 802 | Male  | 44 | Urban | Southwestern | City worker           | Retreatment failure       | Enrolled     |                                |
| 803 | Male  | 25 | Rural | Western      | Farmer                | Retreatment failure       | Enrolled     |                                |
| 804 | Male  | 59 | Rural | Southwestern | Farmer                | Relapse                   | Enrolled     |                                |
| 805 | Male  | 47 | Urban | Northern     | Unemployed/unreported | Retreatment failure       | Not enrolled | studies                        |
| 806 | Femal | 43 | Rural | Western      | Farmer                | Relapse                   | Enrolled     |                                |
| 807 | Male  | 48 | Rural | Western      | Farmer                | Retreatment failure       | Not enrolled | Concern about work and studies |
| 808 | Male  | 38 | Rural | Northern     | Farmer                | New                       | Enrolled     |                                |
| 809 | Male  | 48 | Rural | Northern     | Farmer                | Retreatment failure       | Enrolled     |                                |
| 810 | Male  | 50 | Rural | Central      | Farmer                | Initial treatment failure | Not enrolled | Economic hardship              |
| 811 | Male  | 26 | Rural | Central      | Farmer                | Relapse                   | Enrolled     |                                |
| 812 | Male  | 32 | Rural | Southwestern | Farmer                | Relapse                   | Enrolled     |                                |
| 813 | Femal | 24 | Rural | Northern     | Farmer                | Retreatment failure       | Enrolled     |                                |
| 814 | Femal | 35 | Rural | Southern     | Farmer                | Retreatment failure       | Enrolled     |                                |
| 815 | Male  | 49 | Rural | Central      | Farmer                | Initial treatment failure | Enrolled     |                                |
| 816 | Male  | 33 | Rural | Northern     | Farmer                | Retreatment failure       | Not enrolled | Death                          |
| 817 | Femal | 27 | Urban | Central      | City worker           | Retreatment failure       | Enrolled     |                                |
| 818 | Male  | 29 | Urban | Southern     | City worker           | Relapse                   | Enrolled     |                                |
| 819 | Male  | 52 | Rural | Northern     | Farmer                | Relapse                   | Enrolled     |                                |
| 820 | Femal | 46 | Rural | Southwestern | Farmer                | Relapse                   | Not enrolled | Concern about work and studies |
| 821 | Male  | 64 | Urban | Southwestern | Retired/Student       | Retreatment failure       | Enrolled     |                                |
| 822 | Male  | 39 | Rural | Central      | Farmer                | Retreatment failure       | Enrolled     |                                |
| 823 | Male  | 48 | Rural | Southwestern | Farmer                | Retreatment failure       | Enrolled     |                                |
| 824 | Male  | 59 | Rural | Northern     | Farmer                | Retreatment failure       | Enrolled     |                                |
| 825 | Femal | 29 | Rural | Northern     | Farmer                | Retreatment failure       | Enrolled     |                                |
| 826 | Femal | 34 | Urban | Southern     | City worker           | Retreatment failure       | Enrolled     |                                |
| 827 | Femal | 43 | Rural | Southwestern | Farmer                | Smear+ after 3 ms         | Enrolled     |                                |
| 828 | Male  | 67 | Urban | Southwestern | City worker           | Retreatment failure       | Enrolled     |                                |
| 829 | Male  | 48 | Rural | Southwestern | Farmer                | New                       | Enrolled     |                                |
| 830 | Male  | 59 | Rural | Southern     | Farmer                | Retreatment failure       | Enrolled     |                                |
| 831 | Male  | 42 | Rural | Northern     | Farmer                | New                       | Not enrolled | Out-migration                  |
| 832 | Male  | 67 | Rural | Central      | Farmer                | New                       | Not enrolled | Economic hardship              |
| 833 | Male  | 17 | Rural | Southern     | Farmer                | Relapse                   | Not enrolled | Out-migration                  |
| 834 | Male  | 37 | Urban | Northern     | City worker           | Retreatment failure       | Enrolled     |                                |
| 835 | Male  | 22 | Urban | Southwestern | City worker           | Retreatment failure       | Enrolled     |                                |
| 836 | Male  | 74 | Rural | Southwestern | Farmer                | Relapse                   | Enrolled     |                                |
| 837 | Male  | 50 | Rural | Northern     | Farmer                | Retreatment failure       | Not enrolled | Death                          |
| 838 | Femal | 43 | Rural | Northern     | City worker           | Retreatment failure       | Enrolled     |                                |
| 839 | Femal | 67 | Rural | Southwestern | Farmer                | Retreatment failure       | Enrolled     |                                |
| 840 | Male  | 57 | Rural | Northern     | Farmer                | Retreatment failure       | Enrolled     |                                |
| 841 | Male  | 55 | Urban | Southwestern | Unemployed/unreported | Retreatment failure       | Not enrolled | Non-standard treatment         |
| 842 | Male  | 59 | Rural | Southern     | Farmer                | New                       | Enrolled     |                                |
| 843 | Femal | 33 | Urban | Southern     | Unemployed/unreported | Retreatment failure       | Enrolled     |                                |
| 844 | Femal | 38 | Rural | Northern     | Farmer                | Initial treatment failure | Enrolled     |                                |
| 845 | Male  | 27 | Rural | Unknown      | Farmer                | Relapse                   | Not enrolled | Unknown address                |
| 846 | Male  | 27 | Rural | Central      | Farmer                | New                       | Enrolled     |                                |
| 847 | Male  | 41 | Rural | Southern     | Farmer                | Relapse                   | Not enrolled | Out-migration                  |
| 848 | Femal | 54 | Rural | Central      | Farmer                | Initial treatment failure | Not enrolled | Economic hardship              |
| 849 | Male  | 29 | Rural | Southwestern | Farmer                | Retreatment failure       | Enrolled     |                                |
| 850 | Male  | 49 | Urban | Southern     | City worker           | New                       | Enrolled     |                                |
| 851 | Femal | 44 | Urban | Northern     | City worker           | Retreatment failure       | Enrolled     |                                |

|     |       |    |       |                |                       |                           |              |                                |
|-----|-------|----|-------|----------------|-----------------------|---------------------------|--------------|--------------------------------|
| 852 | Male  | 66 | Rural | Southwestern   | Farmer                | Retreatment failure       | Not enrolled | Death                          |
| 853 | Femal | 26 | Rural | Central        | Farmer                | Retreatment failure       | Enrolled     |                                |
| 854 | Femal | 54 | Rural | Central        | Farmer                | Retreatment failure       | Enrolled     |                                |
| 855 | Male  | 38 | Rural | Southern       | Farmer                | Relapse                   | Enrolled     |                                |
| 856 | Male  | 32 | Urban | Southern       | City worker           | Relapse                   | Enrolled     |                                |
| 857 | Femal | 20 | Rural | Northern       | Farmer                | New                       | Enrolled     |                                |
| 858 | Male  | 69 | Rural | Central        | Farmer                | Relapse                   | Not enrolled | Death                          |
| 859 | Male  | 71 | Rural | Northern       | Farmer                | New                       | Not enrolled | Non-standard treatment         |
| 860 | Male  | 54 | Rural | Central        | Farmer                | New                       | Enrolled     |                                |
| 861 | Male  | 41 | Urban | Central        | Unemployed/unreported | New                       | Not enrolled | Out-migration                  |
| 862 | Male  | 49 | Rural | Central        | Farmer                | Retreatment failure       | Enrolled     |                                |
| 863 | Male  | 43 | Rural | Southwestern   | Farmer                | Initial treatment failure | Not enrolled | Belief of being cured          |
| 864 | Male  | 26 | Rural | Northern       | Farmer                | Relapse                   | Not enrolled | Out-migration                  |
| 865 | Male  | 72 | Urban | Central        | Retired/Student       | New                       | Enrolled     |                                |
| 866 | Male  | 77 | Rural | Central        | Farmer                | Retreatment failure       | Enrolled     |                                |
| 867 | Male  | 60 | Rural | Southern       | Farmer                | Retreatment failure       | Not enrolled | Non-standard treatment         |
| 868 | Male  | 46 | Urban | Southern       | City worker           | Retreatment failure       | Enrolled     |                                |
| 869 | Male  | 68 | Rural | Northern       | Farmer                | New                       | Enrolled     |                                |
| 870 | Femal | 53 | Rural | Southern       | Farmer                | Retreatment failure       | Not enrolled | Death                          |
| 871 | Male  | 62 | Rural | Southern       | Farmer                | Retreatment failure       | Not enrolled | Economic hardship              |
| 872 | Femal | 39 | Rural | Southern       | City worker           | Relapse                   | Enrolled     |                                |
| 873 | Femal | 46 | Rural | Northern       | Farmer                | Retreatment failure       | Enrolled     |                                |
| 874 | Femal | 20 | Urban | Western        | Unemployed/unreported | Relapse                   | Not enrolled | Belief of being cured          |
| 875 | Male  | 27 | Rural | Southwestern   | Farmer                | Retreatment failure       | Enrolled     |                                |
| 876 | Male  | 28 | Urban | Other province | City worker           | Retreatment failure       | Enrolled     |                                |
| 877 | Male  | 73 | Rural | Northern       | Farmer                | New                       | Not enrolled | Belief of being cured          |
| 878 | Femal | 54 | Rural | Central        | Farmer                | Relapse                   | Not enrolled | Belief of being cured          |
| 879 | Femal | 38 | Rural | Southern       | Farmer                | Retreatment failure       | Enrolled     |                                |
| 880 | Male  | 46 | Rural | Southwestern   | Farmer                | Retreatment failure       | Enrolled     |                                |
| 881 | Male  | 30 | Rural | Northern       | Farmer                | New                       | Enrolled     |                                |
| 882 | Male  | 57 | Rural | Southwestern   | Farmer                | Retreatment failure       | Not enrolled | Death                          |
| 883 | Femal | 58 | Rural | Southern       | Farmer                | Retreatment failure       | Not enrolled | Death                          |
| 884 | Male  | 47 | Rural | Southern       | Farmer                | New                       | Not enrolled | Non-standard treatment         |
| 885 | Male  | 46 | Urban | Southern       | City worker           | Relapse                   | Enrolled     |                                |
| 886 | Male  | 59 | Urban | Southern       | Unemployed/unreported | Relapse                   | Enrolled     |                                |
| 887 | Femal | 22 | Rural | Central        | Farmer                | New                       | Enrolled     |                                |
| 888 | Male  | 39 | Urban | Northern       | City worker           | Retreatment failure       | Enrolled     |                                |
| 889 | Male  | 58 | Urban | Southern       | City worker           | New                       | Not enrolled | Concern about work and studies |
| 890 | Male  | 32 | Rural | Southwestern   | Farmer                | Relapse                   | Enrolled     |                                |
| 891 | Male  | 48 | Rural | Southwestern   | Farmer                | Retreatment failure       | Enrolled     |                                |
| 892 | Male  | 43 | Rural | Southern       | Farmer                | Retreatment failure       | Enrolled     |                                |
| 893 | Male  | 30 | Rural | Central        | Farmer                | Retreatment failure       | Enrolled     |                                |
| 894 | Male  | 60 | Rural | Southwestern   | Farmer                | Relapse                   | Not enrolled | Belief of being cured          |
| 895 | Femal | 31 | Rural | Central        | Farmer                | Retreatment failure       | Enrolled     |                                |
| 896 | Femal | 53 | Rural | Southern       | Farmer                | Relapse                   | Enrolled     |                                |
| 897 | Male  | 22 | Rural | Southwestern   | Farmer                | New                       | Enrolled     |                                |
| 898 | Femal | 20 | Rural | Western        | Farmer                | New                       | Enrolled     |                                |
| 899 | Femal | 47 | Rural | Western        | Farmer                | Retreatment failure       | Enrolled     |                                |
| 900 | Male  | 49 | Urban | Central        | City worker           | Retreatment failure       | Enrolled     |                                |
| 901 | Male  | 41 | Rural | Unknown        | Farmer                | Relapse                   | Not enrolled | Unknown address                |
| 902 | Male  | 31 | Urban | Southwestern   | Unemployed/unreported | Retreatment failure       | Not enrolled | studies                        |
| 903 | Male  | 43 | Rural | Western        | Farmer                | Retreatment failure       | Enrolled     |                                |
| 904 | Male  | 51 | Urban | Southern       | City worker           | Initial treatment failure | Enrolled     |                                |
| 905 | Male  | 46 | Urban | Northern       | City worker           | Retreatment failure       | Enrolled     |                                |
| 906 | Femal | 37 | Urban | Western        | City worker           | Retreatment failure       | Enrolled     |                                |
| 907 | Male  | 55 | Rural | Northern       | City worker           | Retreatment failure       | Enrolled     |                                |
| 908 | Male  | 57 | Urban | Northern       | Unemployed/unreported | Retreatment failure       | Enrolled     |                                |
| 909 | Femal | 17 | Rural | Central        | Retired/Student       | Retreatment failure       | Enrolled     |                                |
| 910 | Femal | 52 | Rural | Central        | Farmer                | Retreatment failure       | Enrolled     |                                |
| 911 | Male  | 64 | Rural | Central        | Farmer                | Retreatment failure       | Not enrolled | Economic hardship              |
| 912 | Male  | 40 | Urban | Northern       | Unemployed/unreported | Retreatment failure       | Enrolled     |                                |

|     |       |    |                    |                       |                           |              |                                |
|-----|-------|----|--------------------|-----------------------|---------------------------|--------------|--------------------------------|
| 913 | Male  | 58 | Urban Northern     | City worker           | Relapse                   | Enrolled     |                                |
| 914 | Male  | 37 | Rural Southern     | Farmer                | Relapse                   | Enrolled     |                                |
| 915 | Male  | 57 | Rural Northern     | City worker           | Retreatment failure       | Enrolled     |                                |
| 916 | Male  | 42 | Rural Southern     | Farmer                | New                       | Not enrolled | studies                        |
| 917 | Femal | 26 | Rural Northern     | Farmer                | Relapse                   | Enrolled     |                                |
| 918 | Male  | 46 | Urban Central      | City worker           | Retreatment failure       | Enrolled     |                                |
| 919 | Male  | 62 | Urban Southern     | Retired/Student       | Relapse                   | Enrolled     |                                |
| 920 | Femal | 45 | Urban Southern     | City worker           | Retreatment failure       | Enrolled     |                                |
| 921 | Femal | 36 | Rural Southwestern | Farmer                | Retreatment failure       | Not enrolled | Belief of being cured          |
| 922 | Femal | 50 | Rural Central      | Farmer                | Relapse                   | Enrolled     |                                |
| 923 | Male  | 65 | Rural Northern     | Farmer                | New                       | Enrolled     |                                |
| 924 | Male  | 24 | Rural Northern     | Farmer                | Initial treatment failure | Enrolled     |                                |
| 925 | Femal | 35 | Rural Southwestern | Farmer                | Retreatment failure       | Enrolled     |                                |
| 926 | Male  | 24 | Rural Northern     | Farmer                | Return or other           | Enrolled     |                                |
| 927 | Male  | 50 | Urban Central      | City worker           | New                       | Enrolled     |                                |
| 928 | Male  | 37 | Rural Northern     | Farmer                | New                       | Not enrolled | Out-migration                  |
| 929 | Male  | 48 | Rural Central      | Farmer                | Relapse                   | Not enrolled | Concern about work and studies |
| 930 | Male  | 46 | Urban Southwestern | City worker           | Retreatment failure       | Enrolled     |                                |
| 931 | Male  | 55 | Urban Southwestern | Unemployed/unreported | New                       | Not enrolled | Death                          |
| 932 | Femal | 18 | Rural Western      | Farmer                | Retreatment failure       | Not enrolled | Belief of being cured          |
| 933 | Male  | 48 | Urban Northern     | City worker           | New                       | Enrolled     |                                |
| 934 | Femal | 43 | Urban Southern     | City worker           | Retreatment failure       | Enrolled     |                                |
| 935 | Male  | 14 | Urban Northern     | Retired/Student       | Relapse                   | Not enrolled | Non-standard treatment         |
| 936 | Male  | 72 | Rural Central      | Farmer                | New                       | Not enrolled | Belief of being cured          |
| 937 | Male  | 19 | Rural Northern     | Retired/Student       | Relapse                   | Enrolled     |                                |
| 938 | Male  | 27 | Rural Unknown      | Farmer                | Retreatment failure       | Not enrolled | Unknown address                |
| 939 | Male  | 41 | Urban Southwestern | City worker           | Retreatment failure       | Enrolled     |                                |
| 940 | Femal | 25 | Rural Northern     | Farmer                | Relapse                   | Enrolled     |                                |
| 941 | Male  | 68 | Rural Southwestern | Farmer                | Retreatment failure       | Not enrolled | Non-standard treatment         |
| 942 | Male  | 61 | Rural Southern     | Farmer                | Retreatment failure       | Enrolled     |                                |
| 943 | Male  | 24 | Rural Northern     | Farmer                | Retreatment failure       | Enrolled     |                                |
| 944 | Male  | 68 | Rural Northern     | Farmer                | New                       | Not enrolled | Belief of being cured          |
| 945 | Male  | 48 | Urban Southern     | Unemployed/unreported | Retreatment failure       | Enrolled     |                                |
| 946 | Male  | 61 | Urban Central      | Retired/Student       | Retreatment failure       | Enrolled     |                                |
| 947 | Femal | 52 | Urban Southern     | Unemployed/unreported | Initial treatment failure | Enrolled     |                                |
| 948 | Femal | 53 | Rural Central      | Farmer                | New                       | Not enrolled | Belief of being cured          |
| 949 | Male  | 45 | Urban Northern     | City worker           | Retreatment failure       | Enrolled     |                                |
| 950 | Femal | 52 | Urban Northern     | City worker           | New                       | Enrolled     |                                |
| 951 | Male  | 18 | Rural Northern     | City worker           | Initial treatment failure | Enrolled     |                                |
| 952 | Femal | 27 | Rural Central      | Farmer                | Retreatment failure       | Not enrolled | Other severe disease           |
| 953 | Male  | 18 | Rural Northern     | Retired/Student       | New                       | Enrolled     |                                |
| 954 | Male  | 59 | Urban Southwestern | City worker           | Initial treatment failure | Enrolled     |                                |
| 955 | Male  | 20 | Rural Central      | Farmer                | Initial treatment failure | Enrolled     |                                |
| 956 | Male  | 54 | Rural Northern     | Farmer                | Smear+ after 3 ms         | Not enrolled | Death                          |
| 957 | Male  | 31 | Urban Southern     | City worker           | New                       | Enrolled     |                                |
| 958 | Femal | 31 | Rural Southern     | Farmer                | Initial treatment failure | Not enrolled | Belief of being cured          |
| 959 | Male  | 61 | Rural Southwestern | Farmer                | Relapse                   | Not enrolled | Economic hardship              |
| 960 | Male  | 49 | Rural Western      | Farmer                | New                       | Enrolled     |                                |
| 961 | Femal | 18 | Urban Central      | Retired/Student       | Retreatment failure       | Enrolled     |                                |
| 962 | Male  | 35 | Urban Western      | Unemployed/unreported | Relapse                   | Enrolled     |                                |
| 963 | Male  | 19 | Rural Southern     | Retired/Student       | Retreatment failure       | Enrolled     |                                |
| 964 | Male  | 35 | Rural Southern     | Farmer                | Retreatment failure       | Enrolled     |                                |
| 965 | Male  | 65 | Urban Southern     | Retired/Student       | New                       | Enrolled     |                                |
| 966 | Male  | 60 | Urban Northern     | Unemployed/unreported | Retreatment failure       | Enrolled     |                                |
| 967 | Male  | 50 | Rural Unknown      | Farmer                | Initial treatment failure | Not enrolled | Unknown address                |
| 968 | Femal | 39 | Rural Northern     | Farmer                | Retreatment failure       | Enrolled     |                                |
| 969 | Male  | 58 | Rural Central      | Farmer                | New                       | Enrolled     |                                |
| 970 | Male  | 55 | Rural Central      | Farmer                | Retreatment failure       | Enrolled     |                                |
| 971 | Male  | 51 | Rural Central      | Farmer                | Initial treatment failure | Enrolled     |                                |
| 972 | Male  | 43 | Rural Northern     | Farmer                | Relapse                   | Not enrolled | Out-migration                  |
| 973 | Male  | 61 | Rural Northern     | Farmer                | Relapse                   | Not enrolled | Belief of being cured          |



|      |       |    |       |                |                       |                          |              |                                |
|------|-------|----|-------|----------------|-----------------------|--------------------------|--------------|--------------------------------|
| 974  | Male  | 49 | Urban | Southern       | Unemployed/unreported | New                      | Enrolled     |                                |
| 975  | Femal | 44 | Rural | Southwestern   | Farmer                | Relapse                  | Enrolled     |                                |
| 976  | Male  | 49 | Rural | Unknown        | Farmer                | Smear+ after 3 ms        | Not enrolled | Unknown address                |
| 977  | Male  | 48 | Urban | Central        | City worker           | Retreatment failure      | Enrolled     |                                |
| 978  | Femal | 46 | Rural | Southwestern   | Farmer                | Relapse                  | Enrolled     |                                |
| 979  | Male  | 29 | Urban | Western        | City worker           | Relapse                  | Enrolled     |                                |
| 980  | Male  | 39 | Rural | Southwestern   | Farmer                | New                      | Enrolled     |                                |
| 981  | Male  | 73 | Rural | Central        | Farmer                | Smear+ after 3 ms        | Enrolled     |                                |
| 982  | Male  | 27 | Rural | Other province | Farmer                | New                      | Not enrolled | Migrants from other provinces  |
| 983  | Male  | 44 | Rural | Unknown        | Farmer                | Retreatment failure      | Not enrolled | Unknown address                |
| 984  | Male  | 43 | Rural | Southwestern   | Farmer                | Relapse                  | Not enrolled | Belief of being cured          |
| 985  | Male  | 45 | Rural | Northern       | Farmer                | Relapse                  | Not enrolled | Death                          |
| 986  | Male  | 49 | Rural | Central        | Farmer                | New                      | Enrolled     |                                |
| 987  | Male  | 26 | Urban | Central        | Unemployed/unreported | Relapse                  | Not enrolled | studies                        |
| 988  | Femal | 34 | Rural | Central        | Farmer                | Retreatment failure      | Not enrolled | Belief of being cured          |
| 989  | Femal | 31 | Rural | Northern       | Farmer                | Retreatment failure      | Enrolled     |                                |
| 990  | Male  | 57 | Rural | Central        | Farmer                | Relapse                  | Enrolled     |                                |
| 991  | Male  | 37 | Rural | Western        | Farmer                | Retreatment failure      | Not enrolled | Other severe disease           |
| 992  | Male  | 57 | Rural | Central        | Farmer                | Retreatment failure      | Enrolled     |                                |
| 993  | Male  | 55 | Rural | Southern       | Farmer                | Initial treatment failur | Enrolled     |                                |
| 994  | Femal | 30 | Urban | Western        | City worker           | Relapse                  | Enrolled     |                                |
| 995  | Male  | 28 | Rural | Central        | Farmer                | Retreatment failure      | Enrolled     |                                |
| 996  | Male  | 63 | Rural | Northern       | Farmer                | Retreatment failure      | Not enrolled | Economic hardship              |
| 997  | Male  | 57 | Rural | Central        | Farmer                | Initial treatment failur | Enrolled     |                                |
| 998  | Male  | 40 | Rural | Southwestern   | City worker           | Relapse                  | Enrolled     |                                |
| 999  | Femal | 60 | Rural | Northern       | Farmer                | Relapse                  | Enrolled     |                                |
| 1000 | Male  | 54 | Rural | Southern       | Farmer                | Retreatment failure      | Enrolled     |                                |
| 1001 | Male  | 70 | Rural | Northern       | Retired/Student       | Relapse                  | Enrolled     |                                |
| 1002 | Male  | 57 | Urban | Other province | Unemployed/unreported | Retreatment failure      | Enrolled     |                                |
| 1003 | Male  | 23 | Rural | Northern       | Farmer                | Relapse                  | Enrolled     |                                |
| 1004 | Male  | 57 | Urban | Northern       | City worker           | Retreatment failure      | Enrolled     |                                |
| 1005 | Male  | 67 | Rural | Central        | Farmer                | New                      | Not enrolled | Other severe disease           |
| 1006 | Femal | 43 | Rural | Western        | Farmer                | Retreatment failure      | Not enrolled | Economic hardship              |
| 1007 | Male  | 74 | Urban | Central        | Retired/Student       | Relapse                  | Enrolled     |                                |
| 1008 | Male  | 46 | Rural | Other province | Farmer                | New                      | Not enrolled | Migrants from other provinces  |
| 1009 | Male  | 47 | Rural | Central        | Farmer                | Relapse                  | Not enrolled | Belief of being cured          |
| 1010 | Male  | 50 | Rural | Southern       | Farmer                | New                      | Enrolled     |                                |
| 1011 | Male  | 48 | Urban | Western        | Unemployed/unreported | New                      | Enrolled     |                                |
| 1012 | Male  | 48 | Rural | Southern       | Farmer                | Relapse                  | Enrolled     |                                |
| 1013 | Male  | 30 | Urban | Southwestern   | Unemployed/unreported | New                      | Enrolled     |                                |
| 1014 | Male  | 50 | Rural | Southwestern   | Farmer                | New                      | Enrolled     |                                |
| 1015 | Male  | 56 | Urban | Southwestern   | Unemployed/unreported | New                      | Enrolled     |                                |
| 1016 | Male  | 51 | Urban | Southern       | City worker           | New                      | Not enrolled | studies                        |
| 1017 | Femal | 26 | Rural | Northern       | Farmer                | New                      | Enrolled     |                                |
| 1018 | Male  | 75 | Rural | Northern       | Farmer                | Retreatment failure      | Enrolled     |                                |
| 1019 | Femal | 31 | Rural | Southwestern   | Farmer                | New                      | Not enrolled | Other severe disease           |
| 1020 | Femal | 50 | Rural | Northern       | Farmer                | Relapse                  | Not enrolled | Economic hardship              |
| 1021 | Femal | 37 | Rural | Unknown        | Farmer                | Retreatment failure      | Not enrolled | Unknown address                |
| 1022 | Male  | 42 | Urban | Northern       | Unemployed/unreported | Retreatment failure      | Enrolled     |                                |
| 1023 | Male  | 33 | Rural | Southwestern   | Farmer                | Relapse                  | Not enrolled | Belief of being cured          |
| 1024 | Male  | 34 | Rural | Western        | Farmer                | New                      | Enrolled     |                                |
| 1025 | Male  | 34 | Rural | Southwestern   | Farmer                | New                      | Enrolled     |                                |
| 1026 | Femal | 23 | Urban | Southwestern   | City worker           | Retreatment failure      | Enrolled     |                                |
| 1027 | Femal | 28 | Rural | Southwestern   | Farmer                | Initial treatment failur | Enrolled     |                                |
| 1028 | Femal | 49 | Urban | Southwestern   | Unemployed/unreported | Retreatment failure      | Enrolled     |                                |
| 1029 | Femal | 16 | Rural | Western        | Retired/Student       | Relapse                  | Enrolled     |                                |
| 1030 | Femal | 44 | Urban | Northern       | City worker           | Smear+ after 3 ms        | Enrolled     |                                |
| 1031 | Femal | 44 | Rural | Northern       | Farmer                | Relapse                  | Not enrolled | Death                          |
| 1032 | Male  | 46 | Rural | Northern       | Farmer                | Retreatment failure      | Not enrolled | Concern about work and studies |
| 1033 | Male  | 40 | Rural | Western        | Farmer                | Retreatment failure      | Enrolled     |                                |
| 1034 | Male  | 81 | Rural | Southwestern   | Retired/Student       | Retreatment failure      | Enrolled     |                                |

|      |       |    |       |                |                       |                           |              |                        |
|------|-------|----|-------|----------------|-----------------------|---------------------------|--------------|------------------------|
| 1035 | Male  | 45 | Rural | Northern       | Farmer                | New                       | Enrolled     |                        |
| 1036 | Femal | 41 | Rural | Northern       | Farmer                | Return or other           | Enrolled     |                        |
| 1037 | Femal | 51 | Rural | Southwestern   | Farmer                | Retreatment failure       | Enrolled     |                        |
| 1038 | Male  | 57 | Urban | Southwestern   | Unemployed/unreported | New                       | Enrolled     |                        |
| 1039 | Femal | 40 | Urban | Northern       | Unemployed/unreported | Relapse                   | Not enrolled | Belief of being cured  |
| 1040 | Male  | 47 | Rural | Southwestern   | Farmer                | Retreatment failure       | Enrolled     |                        |
| 1041 | Femal | 65 | Urban | Central        | Retired/Student       | Retreatment failure       | Not enrolled | Out-migration          |
| 1042 | Male  | 48 | Rural | Northern       | Farmer                | Relapse                   | Not enrolled | Economic hardship      |
| 1043 | Femal | 49 | Urban | Northern       | Unemployed/unreported | Relapse                   | Enrolled     |                        |
| 1044 | Femal | 25 | Rural | Central        | Farmer                | New                       | Enrolled     |                        |
| 1045 | Male  | 36 | Rural | Southwestern   | Farmer                | Relapse                   | Enrolled     |                        |
| 1046 | Femal | 33 | Urban | Southwestern   | City worker           | Return or other           | Enrolled     |                        |
| 1047 | Femal | 23 | Rural | Southwestern   | Farmer                | New                       | Enrolled     |                        |
| 1048 | Male  | 53 | Urban | Southern       | City worker           | Retreatment failure       | Enrolled     |                        |
| 1049 | Femal | 61 | Rural | Northern       | Farmer                | New                       | Not enrolled | Death                  |
| 1050 | Femal | 39 | Urban | Unknown        | Unemployed/unreported | Retreatment failure       | Enrolled     |                        |
| 1051 | Male  | 32 | Rural | Central        | Farmer                | New                       | Enrolled     |                        |
| 1052 | Male  | 22 | Rural | Northern       | Farmer                | Relapse                   | Not enrolled | Non-standard treatment |
| 1053 | Male  | 50 | Urban | Central        | City worker           | Relapse                   | Enrolled     |                        |
| 1054 | Femal | 24 | Urban | Central        | Unemployed/unreported | New                       | Enrolled     |                        |
| 1055 | Male  | 41 | Rural | Southwestern   | Farmer                | New                       | Enrolled     |                        |
| 1056 | Male  | 38 | Rural | Southern       | Farmer                | Relapse                   | Enrolled     |                        |
| 1057 | Femal | 30 | Urban | Southwestern   | City worker           | Retreatment failure       | Enrolled     |                        |
| 1058 | Femal | 39 | Rural | Northern       | Farmer                | Relapse                   | Not enrolled | Non-standard treatment |
| 1059 | Male  | 53 | Rural | Central        | Farmer                | Initial treatment failure | Not enrolled | Economic hardship      |
| 1060 | Male  | 49 | Rural | Southwestern   | Farmer                | Retreatment failure       | Enrolled     |                        |
| 1061 | Femal | 24 | Rural | Southern       | Farmer                | New                       | Enrolled     |                        |
| 1062 | Male  | 60 | Rural | Southwestern   | Farmer                | Initial treatment failure | Not enrolled | Death                  |
| 1063 | Male  | 35 | Rural | Southern       | City worker           | Retreatment failure       | Enrolled     |                        |
| 1064 | Male  | 50 | Urban | Southern       | City worker           | New                       | Enrolled     |                        |
| 1065 | Male  | 63 | Urban | Southwestern   | Retired/Student       | Retreatment failure       | Enrolled     |                        |
| 1066 | Femal | 24 | Rural | Southwestern   | Farmer                | Retreatment failure       | Enrolled     |                        |
| 1067 | Male  | 22 | Urban | Southwestern   | City worker           | New                       | Enrolled     |                        |
| 1068 | Male  | 22 | Urban | Western        | Unemployed/unreported | Relapse                   | Not enrolled | Belief of being cured  |
| 1069 | Male  | 52 | Rural | Central        | Farmer                | Relapse                   | Not enrolled | Economic hardship      |
| 1070 | Male  | 25 | Urban | Southwestern   | Unemployed/unreported | Relapse                   | Enrolled     |                        |
| 1071 | Male  | 27 | Rural | Southern       | Farmer                | Retreatment failure       | Enrolled     |                        |
| 1072 | Male  | 30 | Rural | Southwestern   | Farmer                | Relapse                   | Not enrolled | Belief of being cured  |
| 1073 | Femal | 56 | Rural | Southwestern   | Farmer                | New                       | Not enrolled | Economic hardship      |
| 1074 | Male  | 53 | Rural | Central        | Farmer                | Retreatment failure       | Enrolled     |                        |
| 1075 | Femal | 58 | Rural | Central        | Farmer                | New                       | Not enrolled | Non-standard treatment |
| 1076 | Male  | 28 | Rural | Northern       | Farmer                | Initial treatment failure | Enrolled     |                        |
| 1077 | Femal | 35 | Rural | Northern       | Farmer                | Relapse                   | Not enrolled | Out-migration          |
| 1078 | Femal | 23 | Rural | Northern       | Farmer                | New                       | Enrolled     |                        |
| 1079 | Male  | 17 | Rural | Central        | Retired/Student       | Retreatment failure       | Enrolled     |                        |
| 1080 | Male  | 40 | Rural | Southwestern   | Farmer                | New                       | Not enrolled | Out-migration          |
| 1081 | Male  | 47 | Rural | Central        | Farmer                | Relapse                   | Not enrolled | Belief of being cured  |
| 1082 | Male  | 27 | Rural | Southern       | Farmer                | Retreatment failure       | Enrolled     |                        |
| 1083 | Male  | 45 | Rural | Southern       | Farmer                | Relapse                   | Not enrolled | Non-standard treatment |
| 1084 | Male  | 60 | Rural | Southern       | Farmer                | New                       | Enrolled     |                        |
| 1085 | Male  | 48 | Rural | Southern       | Farmer                | New                       | Not enrolled | Belief of being cured  |
| 1086 | Male  | 37 | Rural | Southwestern   | Farmer                | Relapse                   | Enrolled     |                        |
| 1087 | Male  | 18 | Urban | Northern       | City worker           | Smear+ after 3 ms         | Enrolled     |                        |
| 1088 | Male  | 49 | Rural | Southwestern   | Farmer                | Retreatment failure       | Enrolled     |                        |
| 1089 | Male  | 27 | Urban | Central        | Unemployed/unreported | Relapse                   | Enrolled     |                        |
| 1090 | Male  | 29 | Rural | Northern       | City worker           | Relapse                   | Enrolled     |                        |
| 1091 | Male  | 37 | Rural | Unknown        | Farmer                | Retreatment failure       | Not enrolled | Unknown address        |
| 1092 | Male  | 49 | Rural | Southern       | Farmer                | New                       | Not enrolled | Death                  |
| 1093 | Male  | 29 | Urban | Northern       | City worker           | Retreatment failure       | Enrolled     |                        |
| 1094 | Femal | 20 | Rural | Other province | City worker           | Relapse                   | Enrolled     |                        |
| 1095 | Femal | 65 | Urban | Northern       | Retired/Student       | New                       | Enrolled     |                        |

|      |       |    |                      |                       |                           |              |                               |
|------|-------|----|----------------------|-----------------------|---------------------------|--------------|-------------------------------|
| 1096 | Male  | 22 | Urban Central        | City worker           | New                       | Enrolled     |                               |
| 1097 | Male  | 38 | Urban Central        | City worker           | New                       | Enrolled     |                               |
| 1098 | Male  | 84 | Rural Central        | Farmer                | New                       | Not enrolled | Belief of being cured         |
| 1099 | Male  | 45 | Rural Central        | Farmer                | Retreatment failure       | Not enrolled | studies                       |
| 1100 | Femal | 62 | Rural Unknown        | Farmer                | New                       | Not enrolled | Unknown address               |
| 1101 | Male  | 37 | Rural Southern       | Farmer                | Relapse                   | Enrolled     |                               |
| 1102 | Male  | 50 | Urban Southern       | Unemployed/unreported | New                       | Not enrolled | Non-standard treatment        |
| 1103 | Femal | 41 | Rural Northern       | Farmer                | Retreatment failure       | Enrolled     |                               |
| 1104 | Male  | 31 | Rural Southern       | Farmer                | New                       | Not enrolled | Other severe disease          |
| 1105 | Male  | 55 | Urban Northern       | City worker           | Relapse                   | Enrolled     |                               |
| 1106 | Femal | 33 | Rural Northern       | Farmer                | Retreatment failure       | Enrolled     |                               |
| 1107 | Femal | 42 | Urban Northern       | Unemployed/unreported | Retreatment failure       | Enrolled     |                               |
| 1108 | Male  | 56 | Rural Northern       | Farmer                | New                       | Not enrolled | Economic hardship             |
| 1109 | Male  | 42 | Rural Southern       | Farmer                | Initial treatment failure | Not enrolled | Belief of being cured         |
| 1110 | Male  | 46 | Urban Northern       | Unemployed/unreported | Retreatment failure       | Enrolled     |                               |
| 1111 | Male  | 58 | Rural Central        | Farmer                | Retreatment failure       | Enrolled     |                               |
| 1112 | Male  | 52 | Rural Central        | Farmer                | Relapse                   | Not enrolled | Economic hardship             |
| 1113 | Male  | 23 | Rural Northern       | Farmer                | Retreatment failure       | Enrolled     |                               |
| 1114 | Femal | 84 | Rural Central        | Farmer                | Smear+ after 3 ms         | Not enrolled | Other severe disease          |
| 1115 | Femal | 23 | Rural Southern       | Farmer                | Retreatment failure       | Enrolled     |                               |
| 1116 | Femal | 42 | Rural Central        | Farmer                | Retreatment failure       | Enrolled     |                               |
| 1117 | Femal | 49 | Rural Southern       | Farmer                | Initial treatment failure | Enrolled     |                               |
| 1118 | Male  | 57 | Rural Northern       | Farmer                | Relapse                   | Enrolled     |                               |
| 1119 | Male  | 50 | Urban Northern       | City worker           | Relapse                   | Enrolled     |                               |
| 1120 | Male  | 47 | Rural Southwestern   | City worker           | Retreatment failure       | Enrolled     |                               |
| 1121 | Male  | 69 | Rural Northern       | Farmer                | New                       | Enrolled     |                               |
| 1122 | Male  | 36 | Urban Southwestern   | City worker           | Retreatment failure       | Enrolled     |                               |
| 1123 | Femal | 56 | Urban Southwestern   | City worker           | Retreatment failure       | Enrolled     |                               |
| 1124 | Male  | 44 | Urban Northern       | City worker           | Retreatment failure       | Enrolled     |                               |
| 1125 | Male  | 59 | Urban Southwestern   | Unemployed/unreported | Initial treatment failure | Enrolled     |                               |
| 1126 | Male  | 17 | Urban Southwestern   | Retired/Student       | New                       | Enrolled     |                               |
| 1127 | Male  | 56 | Rural Central        | Farmer                | New                       | Not enrolled | Non-standard treatment        |
| 1128 | Male  | 34 | Rural Central        | Farmer                | Initial treatment failure | Enrolled     |                               |
| 1129 | Male  | 46 | Rural Western        | Farmer                | Relapse                   | Enrolled     |                               |
| 1130 | Male  | 28 | Rural Southwestern   | Farmer                | New                       | Enrolled     |                               |
| 1131 | Male  | 67 | Rural Southern       | Farmer                | Relapse                   | Not enrolled | Non-standard treatment        |
| 1132 | Femal | 22 | Rural Western        | Farmer                | Relapse                   | Enrolled     |                               |
| 1133 | Femal | 52 | Urban Southern       | City worker           | Retreatment failure       | Enrolled     |                               |
| 1134 | Male  | 49 | Rural Central        | Farmer                | Initial treatment failure | Not enrolled | Belief of being cured         |
| 1135 | Male  | 47 | Urban Southwestern   | Unemployed/unreported | New                       | Enrolled     |                               |
| 1136 | Male  | 59 | Rural Southwestern   | Farmer                | Retreatment failure       | Enrolled     |                               |
| 1137 | Femal | 27 | Rural Northern       | Farmer                | Retreatment failure       | Enrolled     |                               |
| 1138 | Femal | 43 | Rural Southern       | Farmer                | Relapse                   | Enrolled     |                               |
| 1139 | Femal | 45 | Rural Southwestern   | Farmer                | Relapse                   | Enrolled     |                               |
| 1140 | Male  | 70 | Rural Unknown        | Farmer                | Retreatment failure       | Not enrolled | Unknown address               |
| 1141 | Male  | 56 | Rural Central        | Farmer                | Relapse                   | Enrolled     |                               |
| 1142 | Male  | 43 | Rural Northern       | Farmer                | Retreatment failure       | Enrolled     |                               |
| 1143 | Femal | 35 | Rural Central        | Farmer                | Retreatment failure       | Not enrolled | Out-migration                 |
| 1144 | Femal | 40 | Rural Western        | Farmer                | Initial treatment failure | Enrolled     |                               |
| 1145 | Femal | 45 | Urban Northern       | Unemployed/unreported | Retreatment failure       | Enrolled     |                               |
| 1146 | Male  | 57 | Rural Southwestern   | Farmer                | Relapse                   | Enrolled     |                               |
| 1147 | Femal | 37 | Rural Southwestern   | Farmer                | Retreatment failure       | Enrolled     |                               |
| 1148 | Male  | 46 | Rural Southwestern   | Farmer                | Retreatment failure       | Enrolled     |                               |
| 1149 | Male  | 51 | Urban Northern       | Unemployed/unreported | Retreatment failure       | Enrolled     |                               |
| 1150 | Male  | 73 | Rural Southwestern   | Farmer                | Retreatment failure       | Not enrolled | Death                         |
| 1151 | Male  | 12 | Urban Southwestern   | Retired/Student       | Retreatment failure       | Enrolled     |                               |
| 1152 | Male  | 40 | Rural Southwestern   | Farmer                | Relapse                   | Enrolled     |                               |
| 1153 | Male  | 65 | Urban Northern       | Retired/Student       | Retreatment failure       | Not enrolled | Other severe disease          |
| 1154 | Male  | 63 | Rural Northern       | Farmer                | New                       | Not enrolled | Out-migration                 |
| 1155 | Femal | 25 | Rural Other province | Farmer                | Retreatment failure       | Not enrolled | Migrants from other provinces |
| 1156 | Male  | 31 | Rural Western        | Farmer                | Relapse                   | Not enrolled | Out-migration                 |

|      |       |    |       |              |                       |                          |              |                       |
|------|-------|----|-------|--------------|-----------------------|--------------------------|--------------|-----------------------|
| 1157 | Femal | 80 | Urban | Northern     | Retired/Student       | Initial treatment failur | Not enrolled | Other severe disease  |
| 1158 | Male  | 76 | Rural | Northern     | Farmer                | New                      | Enrolled     |                       |
| 1159 | Femal | 28 | Urban | Southwestern | Unemployed/unreported | Retreatment failure      | Enrolled     |                       |
| 1160 | Femal | 28 | Rural | Central      | Farmer                | New                      | Enrolled     |                       |
| 1161 | Male  | 53 | Rural | Southwestern | Farmer                | Retreatment failure      | Not enrolled | Economic hardship     |
| 1162 | Male  | 58 | Rural | Central      | Farmer                | Retreatment failure      | Enrolled     |                       |
| 1163 | Male  | 66 | Rural | Central      | Retired/Student       | Retreatment failure      | Not enrolled | Economic hardship     |
| 1164 | Male  | 54 | Rural | Southern     | Farmer                | Retreatment failure      | Enrolled     |                       |
| 1165 | Male  | 61 | Rural | Northern     | Retired/Student       | Relapse                  | Not enrolled | Economic hardship     |
| 1166 | Male  | 41 | Rural | Northern     | Farmer                | Relapse                  | Enrolled     |                       |
| 1167 | Male  | 63 | Rural | Northern     | Retired/Student       | New                      | Enrolled     |                       |
| 1168 | Male  | 59 | Rural | Southern     | Farmer                | New                      | Not enrolled | Economic hardship     |
| 1169 | Male  | 59 | Urban | Southwestern | Unemployed/unreported | Retreatment failure      | Enrolled     |                       |
| 1170 | Male  | 26 | Urban | Southwestern | Unemployed/unreported | Initial treatment failur | Enrolled     |                       |
| 1171 | Male  | 45 | Rural | Central      | Farmer                | Retreatment failure      | Enrolled     |                       |
| 1172 | Male  | 64 | Rural | Southwestern | Farmer                | New                      | Not enrolled | Economic hardship     |
| 1173 | Male  | 33 | Urban | Southwestern | Unemployed/unreported | Relapse                  | Enrolled     |                       |
| 1174 | Male  | 58 | Urban | Southwestern | City worker           | Relapse                  | Enrolled     |                       |
| 1175 | Male  | 59 | Rural | Southwestern | Farmer                | Retreatment failure      | Not enrolled | Death                 |
| 1176 | Male  | 31 | Rural | Central      | Farmer                | New                      | Enrolled     |                       |
| 1177 | Male  | 35 | Urban | Southwestern | City worker           | Relapse                  | Enrolled     |                       |
| 1178 | Femal | 23 | Urban | Northern     | City worker           | Retreatment failure      | Enrolled     |                       |
| 1179 | Male  | 25 | Rural | Southern     | Farmer                | Initial treatment failur | Enrolled     |                       |
| 1180 | Male  | 77 | Rural | Northern     | Farmer                | New                      | Not enrolled | studies               |
| 1181 | Male  | 23 | Rural | Western      | Farmer                | Retreatment failure      | Not enrolled | Belief of being cured |
| 1182 | Male  | 43 | Urban | Northern     | City worker           | Retreatment failure      | Enrolled     |                       |
| 1183 | Male  | 47 | Rural | Central      | Farmer                | Relapse                  | Not enrolled | Belief of being cured |
| 1184 | Femal | 46 | Urban | Northern     | Unemployed/unreported | Initial treatment failur | Enrolled     |                       |
| 1185 | Male  | 28 | Rural | Northern     | Farmer                | New                      | Enrolled     |                       |
| 1186 | Femal | 43 | Urban | Southwestern | Unemployed/unreported | Retreatment failure      | Enrolled     |                       |
| 1187 | Male  | 23 | Urban | Central      | City worker           | Retreatment failure      | Enrolled     |                       |
| 1188 | Femal | 31 | Urban | Northern     | City worker           | Relapse                  | Enrolled     |                       |
| 1189 | Male  | 46 | Urban | Northern     | City worker           | Retreatment failure      | Enrolled     |                       |
| 1190 | Male  | 33 | Rural | Southwestern | Farmer                | Relapse                  | Not enrolled | Other severe disease  |
| 1191 | Male  | 37 | Urban | Southwestern | City worker           | Retreatment failure      | Enrolled     |                       |
| 1192 | Male  | 24 | Urban | Northern     | City worker           | Retreatment failure      | Enrolled     |                       |
| 1193 | Male  | 73 | Rural | Northern     | Farmer                | Retreatment failure      | Enrolled     |                       |
| 1194 | Femal | 49 | Rural | Southwestern | Farmer                | Initial treatment failur | Not enrolled | Belief of being cured |
| 1195 | Male  | 61 | Urban | Southern     | Retired/Student       | Retreatment failure      | Enrolled     |                       |
| 1196 | Femal | 42 | Rural | Southwestern | Farmer                | Relapse                  | Enrolled     |                       |
| 1197 | Male  | 42 | Rural | Northern     | Farmer                | Retreatment failure      | Enrolled     |                       |
| 1198 | Male  | 76 | Urban | Central      | Retired/Student       | Return or other          | Enrolled     |                       |
| 1199 | Femal | 34 | Urban | Northern     | City worker           | Retreatment failure      | Enrolled     |                       |
| 1200 | Male  | 83 | Urban | Central      | Retired/Student       | New                      | Enrolled     |                       |
| 1201 | Male  | 54 | Rural | Northern     | Farmer                | Initial treatment failur | Not enrolled | Death                 |
| 1202 | Femal | 48 | Rural | Northern     | Farmer                | Retreatment failure      | Enrolled     |                       |
| 1203 | Male  | 51 | Urban | Central      | Unemployed/unreported | Retreatment failure      | Not enrolled | studies               |
| 1204 | Male  | 45 | Rural | Central      | Farmer                | Relapse                  | Enrolled     |                       |
| 1205 | Femal | 47 | Rural | Southwestern | Farmer                | New                      | Enrolled     |                       |
| 1206 | Male  | 55 | Rural | Central      | Farmer                | Retreatment failure      | Enrolled     |                       |
| 1207 | Male  | 49 | Rural | Central      | Farmer                | Relapse                  | Not enrolled | Economic hardship     |
| 1208 | Femal | 34 | Urban | Central      | Unemployed/unreported | Retreatment failure      | Enrolled     |                       |
| 1209 | Male  | 25 | Rural | Southwestern | Farmer                | Relapse                  | Enrolled     |                       |
| 1210 | Male  | 54 | Rural | Central      | Farmer                | Retreatment failure      | Not enrolled | Belief of being cured |
| 1211 | Male  | 71 | Rural | Central      | Farmer                | Relapse                  | Not enrolled | Other severe disease  |
| 1212 | Male  | 70 | Rural | Southwestern | Retired/Student       | Retreatment failure      | Not enrolled | Out-migration         |
| 1213 | Femal | 40 | Rural | Southern     | Farmer                | Return or other          | Not enrolled | Out-migration         |
| 1214 | Femal | 40 | Rural | Unknown      | Farmer                | Retreatment failure      | Not enrolled | Unknown address       |
| 1215 | Male  | 46 | Rural | Southern     | Farmer                | New                      | Not enrolled | Death                 |
| 1216 | Male  | 41 | Rural | Central      | Farmer                | Retreatment failure      | Not enrolled | Economic hardship     |
| 1217 | Male  | 22 | Urban | Central      | Unemployed/unreported | Smear+ after 3 ms        | Enrolled     |                       |

|      |        |    |       |              |                       |                           |              |                        |
|------|--------|----|-------|--------------|-----------------------|---------------------------|--------------|------------------------|
| 1218 | Male   | 72 | Rural | Central      | Retired/Student       | Retreatment failure       | Enrolled     |                        |
| 1219 | Male   | 26 | Rural | Southwestern | Farmer                | Initial treatment failure | Enrolled     |                        |
| 1220 | Male   | 37 | Urban | Northern     | City worker           | Relapse                   | Enrolled     |                        |
| 1221 | Male   | 25 | Urban | Northern     | City worker           | Initial treatment failure | Enrolled     |                        |
| 1222 | Female | 33 | Rural | Northern     | Farmer                | Relapse                   | Not enrolled | studies                |
| 1223 | Male   | 27 | Urban | Northern     | Unemployed/unreported | Retreatment failure       | Enrolled     |                        |
| 1224 | Male   | 37 | Rural | Western      | Farmer                | Relapse                   | Enrolled     |                        |
| 1225 | Male   | 45 | Rural | Northern     | Farmer                | Relapse                   | Enrolled     |                        |
| 1226 | Male   | 35 | Urban | Northern     | Unemployed/unreported | Relapse                   | Enrolled     |                        |
| 1227 | Male   | 49 | Rural | Central      | Farmer                | Retreatment failure       | Not enrolled | Belief of being cured  |
| 1228 | Male   | 35 | Urban | Northern     | Unemployed/unreported | Retreatment failure       | Enrolled     |                        |
| 1229 | Male   | 71 | Rural | Central      | Farmer                | New                       | Not enrolled | Economic hardship      |
| 1230 | Female | 53 | Rural | Central      | Farmer                | Relapse                   | Enrolled     |                        |
| 1231 | Male   | 58 | Rural | Northern     | Farmer                | New                       | Not enrolled | Non-standard treatment |
| 1232 | Male   | 67 | Urban | Central      | Retired/Student       | Relapse                   | Not enrolled | Other severe disease   |
| 1233 | Male   | 24 | Rural | Southwestern | Farmer                | Relapse                   | Not enrolled | Economic hardship      |
| 1234 | Male   | 69 | Rural | Northern     | Farmer                | Retreatment failure       | Not enrolled | Death                  |
| 1235 | Male   | 22 | Rural | Northern     | Farmer                | Retreatment failure       | Enrolled     |                        |
| 1236 | Male   | 39 | Urban | Central      | Unemployed/unreported | Initial treatment failure | Enrolled     |                        |
| 1237 | Male   | 28 | Rural | Northern     | Farmer                | Retreatment failure       | Enrolled     |                        |
| 1238 | Female | 40 | Rural | Central      | Farmer                | New                       | Enrolled     |                        |
| 1239 | Male   | 53 | Rural | Southwestern | Farmer                | New                       | Enrolled     |                        |
| 1240 | Male   | 67 | Urban | Northern     | Retired/Student       | Relapse                   | Enrolled     |                        |
| 1241 | Male   | 69 | Rural | Northern     | Retired/Student       | Retreatment failure       | Enrolled     |                        |
| 1242 | Male   | 52 | Rural | Central      | Farmer                | Retreatment failure       | Not enrolled | Economic hardship      |
| 1243 | Male   | 53 | Rural | Southwestern | Farmer                | Relapse                   | Not enrolled | Non-standard treatment |
| 1244 | Female | 22 | Rural | Northern     | Farmer                | Retreatment failure       | Not enrolled | Non-standard treatment |
| 1245 | Female | 27 | Rural | Southwestern | Farmer                | Retreatment failure       | Enrolled     |                        |
| 1246 | Female | 50 | Rural | Central      | Farmer                | Relapse                   | Enrolled     |                        |
| 1247 | Male   | 75 | Rural | Southwestern | Retired/Student       | Retreatment failure       | Not enrolled | Death                  |
| 1248 | Male   | 35 | Rural | Central      | Farmer                | Retreatment failure       | Enrolled     |                        |
| 1249 | Male   | 44 | Rural | Southwestern | Farmer                | Relapse                   | Enrolled     |                        |
| 1250 | Male   | 47 | Rural | Central      | Farmer                | Retreatment failure       | Enrolled     |                        |
| 1251 | Male   | 54 | Rural | Northern     | Farmer                | Retreatment failure       | Not enrolled | Economic hardship      |
| 1252 | Female | 54 | Rural | Southwestern | Farmer                | Retreatment failure       | Not enrolled | Belief of being cured  |
| 1253 | Male   | 46 | Urban | Northern     | Farmer                | Relapse                   | Not enrolled | Economic hardship      |
| 1254 | Male   | 20 | Rural | Southern     | Farmer                | New                       | Enrolled     |                        |
| 1255 | Male   | 31 | Rural | Southwestern | Farmer                | Relapse                   | Not enrolled | Economic hardship      |
| 1256 | Male   | 58 | Rural | Northern     | Farmer                | New                       | Enrolled     |                        |
| 1257 | Male   | 40 | Rural | Southwestern | Farmer                | Relapse                   | Not enrolled | Belief of being cured  |
| 1258 | Male   | 43 | Rural | Southwestern | Farmer                | Initial treatment failure | Enrolled     |                        |
| 1259 | Male   | 21 | Rural | Southwestern | Farmer                | Retreatment failure       | Enrolled     |                        |
| 1260 | Male   | 45 | Rural | Southern     | Farmer                | Retreatment failure       | Not enrolled | Economic hardship      |
| 1261 | Male   | 31 | Rural | Southern     | Farmer                | Retreatment failure       | Enrolled     |                        |
| 1262 | Male   | 42 | Rural | Southern     | Farmer                | Relapse                   | Enrolled     |                        |
| 1263 | Male   | 44 | Rural | Northern     | Farmer                | Retreatment failure       | Enrolled     |                        |
| 1264 | Female | 38 | Rural | Central      | Farmer                | New                       | Enrolled     |                        |
| 1265 | Male   | 70 | Rural | Northern     | Retired/Student       | New                       | Not enrolled | Other severe disease   |
| 1266 | Male   | 21 | Rural | Central      | Farmer                | Relapse                   | Enrolled     |                        |
| 1267 | Male   | 49 | Urban | Northern     | Unemployed/unreported | New                       | Enrolled     |                        |
| 1268 | Male   | 60 | Rural | Southern     | Farmer                | Relapse                   | Not enrolled | Non-standard treatment |
| 1269 | Male   | 49 | Rural | Northern     | Farmer                | Relapse                   | Enrolled     |                        |
| 1270 | Female | 42 | Rural | Western      | Farmer                | Retreatment failure       | Enrolled     |                        |
| 1271 | Female | 45 | Rural | Southwestern | Farmer                | Initial treatment failure | Enrolled     |                        |
| 1272 | Male   | 41 | Rural | Southern     | Farmer                | Retreatment failure       | Enrolled     |                        |
| 1273 | Female | 35 | Urban | Southwestern | City worker           | Initial treatment failure | Not enrolled | Belief of being cured  |
| 1274 | Male   | 64 | Urban | Northern     | Retired/Student       | New                       | Enrolled     |                        |
| 1275 | Male   | 48 | Rural | Southwestern | Farmer                | Relapse                   | Not enrolled | Economic hardship      |
| 1276 | Male   | 53 | Rural | Southern     | Farmer                | Retreatment failure       | Enrolled     |                        |
| 1277 | Female | 37 | Rural | Southwestern | Farmer                | Retreatment failure       | Not enrolled | Out-migration          |
| 1278 | Male   | 41 | Rural | Central      | Farmer                | New                       | Enrolled     |                        |

|      |       |    |       |                |                       |                           |              |                                |
|------|-------|----|-------|----------------|-----------------------|---------------------------|--------------|--------------------------------|
| 1279 | Male  | 40 | Rural | Western        | Farmer                | Retreatment failure       | Not enrolled | Belief of being cured          |
| 1280 | Male  | 44 | Rural | Other province | Farmer                | Retreatment failure       | Enrolled     |                                |
| 1281 | Male  | 62 | Rural | Southern       | Retired/Student       | Retreatment failure       | Not enrolled | Economic hardship              |
| 1282 | Male  | 53 | Rural | Northern       | Farmer                | New                       | Enrolled     |                                |
| 1283 | Male  | 56 | Rural | Southwestern   | Farmer                | Retreatment failure       | Not enrolled | Death                          |
| 1284 | Male  | 46 | Rural | Central        | Farmer                | Relapse                   | Enrolled     |                                |
| 1285 | Male  | 41 | Rural | Central        | Farmer                | Retreatment failure       | Enrolled     |                                |
| 1286 | Male  | 50 | Rural | Southwestern   | Farmer                | Retreatment failure       | Enrolled     |                                |
| 1287 | Femal | 24 | Rural | Southwestern   | Farmer                | Relapse                   | Enrolled     |                                |
| 1288 | Male  | 50 | Rural | Central        | Farmer                | Initial treatment failure | Not enrolled | Belief of being cured          |
| 1289 | Male  | 35 | Rural | Central        | Farmer                | New                       | Not enrolled | Belief of being cured          |
| 1290 | Male  | 42 | Urban | Northern       | Unemployed/unreported | Retreatment failure       | Enrolled     |                                |
| 1291 | Male  | 61 | Urban | Western        | Retired/Student       | Retreatment failure       | Enrolled     |                                |
| 1292 | Male  | 59 | Rural | Southwestern   | Farmer                | New                       | Not enrolled | Economic hardship              |
| 1293 | Male  | 55 | Rural | Southern       | Farmer                | Relapse                   | Enrolled     |                                |
| 1294 | Male  | 45 | Rural | Southern       | Farmer                | Retreatment failure       | Not enrolled | Concern about work and studies |
| 1295 | Male  | 57 | Urban | Southwestern   | City worker           | Retreatment failure       | Enrolled     |                                |
| 1296 | Femal | 37 | Rural | Southwestern   | Farmer                | Relapse                   | Enrolled     |                                |
| 1297 | Male  | 53 | Rural | Southwestern   | Farmer                | Relapse                   | Enrolled     |                                |
| 1298 | Male  | 49 | Rural | Southern       | Farmer                | Retreatment failure       | Enrolled     |                                |
| 1299 | Male  | 20 | Urban | Northern       | Retired/Student       | Retreatment failure       | Enrolled     |                                |
| 1300 | Male  | 62 | Rural | Central        | Retired/Student       | New                       | Enrolled     |                                |
| 1301 | Male  | 16 | Rural | Northern       | Retired/Student       | Relapse                   | Enrolled     |                                |
| 1302 | Male  | 50 | Rural | Southwestern   | Farmer                | Relapse                   | Enrolled     |                                |
| 1303 | Male  | 60 | Rural | Northern       | Farmer                | Retreatment failure       | Enrolled     |                                |
| 1304 | Femal | 41 | Rural | Southern       | Farmer                | Relapse                   | Enrolled     |                                |
| 1305 | Male  | 21 | Rural | Southwestern   | Farmer                | New                       | Enrolled     |                                |
| 1306 | Male  | 42 | Rural | Southwestern   | Farmer                | Retreatment failure       | Not enrolled | Economic hardship              |
| 1307 | Male  | 37 | Rural | Southern       | Farmer                | Retreatment failure       | Enrolled     |                                |
| 1308 | Male  | 38 | Rural | Northern       | Farmer                | New                       | Not enrolled | Belief of being cured          |
| 1309 | Femal | 47 | Rural | Western        | Farmer                | Retreatment failure       | Enrolled     |                                |
| 1310 | Male  | 26 | Rural | Southwestern   | Farmer                | New                       | Enrolled     |                                |
| 1311 | Femal | 67 | Rural | Southwestern   | Retired/Student       | Retreatment failure       | Enrolled     |                                |
| 1312 | Femal | 67 | Urban | Central        | City worker           | Retreatment failure       | Enrolled     |                                |
| 1313 | Male  | 31 | Rural | Northern       | Farmer                | Retreatment failure       | Enrolled     |                                |
| 1314 | Male  | 64 | Rural | Northern       | Retired/Student       | Retreatment failure       | Not enrolled | Death                          |
| 1315 | Male  | 43 | Urban | Northern       | Unemployed/unreported | Relapse                   | Not enrolled | studies                        |
| 1316 | Femal | 29 | Rural | Southern       | Farmer                | Initial treatment failure | Enrolled     |                                |
| 1317 | Male  | 58 | Rural | Southern       | Farmer                | Relapse                   | Enrolled     |                                |
| 1318 | Male  | 40 | Urban | Western        | City worker           | Retreatment failure       | Enrolled     |                                |
| 1319 | Femal | 23 | Rural | Western        | Farmer                | Initial treatment failure | Enrolled     |                                |
| 1320 | Femal | 31 | Rural | Southern       | Farmer                | Retreatment failure       | Enrolled     |                                |
| 1321 | Male  | 41 | Rural | Northern       | Farmer                | Retreatment failure       | Enrolled     |                                |
| 1322 | Male  | 57 | Rural | Northern       | Farmer                | Retreatment failure       | Not enrolled | Economic hardship              |
| 1323 | Male  | 66 | Rural | Central        | Farmer                | Retreatment failure       | Not enrolled | Economic hardship              |
| 1324 | Male  | 44 | Rural | Northern       | Farmer                | Relapse                   | Not enrolled | Economic hardship              |
| 1325 | Male  | 23 | Rural | Southern       | Farmer                | New                       | Not enrolled | Belief of being cured          |
| 1326 | Male  | 56 | Rural | Northern       | Farmer                | Retreatment failure       | Enrolled     |                                |
| 1327 | Male  | 25 | Rural | Western        | Farmer                | Retreatment failure       | Enrolled     |                                |
| 1328 | Male  | 63 | Rural | Northern       | Farmer                | Relapse                   | Not enrolled | Death                          |
| 1329 | Male  | 32 | Rural | Central        | Farmer                | Relapse                   | Not enrolled | Economic hardship              |
| 1330 | Femal | 52 | Rural | Southwestern   | Farmer                | Retreatment failure       | Enrolled     |                                |
| 1331 | Male  | 35 | Rural | Southwestern   | Farmer                | Initial treatment failure | Not enrolled | Economic hardship              |
| 1332 | Male  | 58 | Rural | Northern       | Farmer                | Initial treatment failure | Enrolled     |                                |
| 1333 | Male  | 32 | Rural | Western        | Farmer                | Retreatment failure       | Enrolled     |                                |
| 1334 | Male  | 23 | Urban | Central        | Unemployed/unreported | Retreatment failure       | Enrolled     |                                |
| 1335 | Femal | 34 | Rural | Southern       | Farmer                | Retreatment failure       | Enrolled     |                                |
| 1336 | Femal | 68 | Rural | Northern       | Farmer                | Retreatment failure       | Not enrolled | Economic hardship              |
| 1337 | Femal | 42 | Rural | Other province | Farmer                | New                       | Enrolled     |                                |
| 1338 | Femal | 23 | Rural | Southwestern   | Farmer                | New                       | Enrolled     |                                |
| 1339 | Femal | 23 | Rural | Southwestern   | Farmer                | New                       | Enrolled     |                                |

|      |       |    |       |                |                       |                           |              |                               |
|------|-------|----|-------|----------------|-----------------------|---------------------------|--------------|-------------------------------|
| 1340 | Femal | 26 | Rural | Other province | Farmer                | Relapse                   | Not enrolled | Migrants from other provinces |
| 1341 | Femal | 21 | Rural | Western        | Farmer                | Retreatment failure       | Enrolled     |                               |
| 1342 | Male  | 69 | Urban | Western        | City worker           | Initial treatment failure | Enrolled     |                               |
| 1343 | Male  | 47 | Rural | Southwestern   | Farmer                | New                       | Enrolled     |                               |
| 1344 | Male  | 59 | Rural | Northern       | Farmer                | New                       | Enrolled     |                               |
| 1345 | Male  | 48 | Rural | Southern       | Farmer                | Retreatment failure       | Enrolled     |                               |
| 1346 | Femal | 58 | Rural | Northern       | Farmer                | Retreatment failure       | Enrolled     |                               |
| 1347 | Male  | 26 | Rural | Central        | Farmer                | Retreatment failure       | Enrolled     |                               |
| 1348 | Femal | 26 | Rural | Southern       | Farmer                | Relapse                   | Enrolled     |                               |
| 1349 | Male  | 63 | Rural | Northern       | Farmer                | Relapse                   | Not enrolled | studies                       |
| 1350 | Male  | 44 | Rural | Southwestern   | Farmer                | Retreatment failure       | Enrolled     |                               |
| 1351 | Male  | 47 | Rural | Central        | Farmer                | Relapse                   | Not enrolled | Belief of being cured         |
| 1352 | Male  | 56 | Rural | Central        | Farmer                | Relapse                   | Not enrolled | Belief of being cured         |
| 1353 | Male  | 33 | Rural | Western        | Farmer                | New                       | Enrolled     |                               |
| 1354 | Male  | 48 | Rural | Southern       | Farmer                | Relapse                   | Enrolled     |                               |
| 1355 | Male  | 67 | Rural | Southern       | Farmer                | Initial treatment failure | Enrolled     |                               |
| 1356 | Male  | 58 | Urban | Southern       | Unemployed/unreported | Initial treatment failure | Enrolled     |                               |
| 1357 | Male  | 76 | Rural | Southwestern   | Farmer                | Relapse                   | Not enrolled | Economic hardship             |
| 1358 | Femal | 44 | Rural | Central        | Farmer                | New                       | Not enrolled | Belief of being cured         |
| 1359 | Femal | 37 | Rural | Unknown        | Farmer                | Retreatment failure       | Not enrolled | Unknown address               |
| 1360 | Femal | 25 | Rural | Southern       | Farmer                | Retreatment failure       | Enrolled     |                               |
| 1361 | Femal | 29 | Rural | Southern       | Farmer                | Retreatment failure       | Enrolled     |                               |
| 1362 | Femal | 19 | Rural | Southern       | Retired/Student       | Retreatment failure       | Enrolled     |                               |
| 1363 | Male  | 45 | Rural | Central        | Farmer                | Relapse                   | Enrolled     |                               |
| 1364 | Femal | 19 | Rural | Southern       | Retired/Student       | Retreatment failure       | Enrolled     |                               |
| 1365 | Male  | 58 | Rural | Southern       | Farmer                | Retreatment failure       | Enrolled     |                               |
| 1366 | Femal | 51 | Rural | Southern       | Farmer                | Relapse                   | Enrolled     |                               |
| 1367 | Male  | 51 | Rural | Southern       | Farmer                | Retreatment failure       | Not enrolled | Death                         |
| 1368 | Male  | 58 | Rural | Southern       | Farmer                | Relapse                   | Not enrolled | Non-standard treatment        |
| 1369 | Male  | 49 | Rural | Southern       | Farmer                | Relapse                   | Enrolled     |                               |
| 1370 | Male  | 48 | Rural | Southern       | Farmer                | Retreatment failure       | Enrolled     |                               |
| 1371 | Male  | 62 | Rural | Central        | Farmer                | Relapse                   | Enrolled     |                               |
| 1372 | Male  | 21 | Rural | Central        | Farmer                | Retreatment failure       | Enrolled     |                               |
| 1373 | Male  | 23 | Rural | Central        | Farmer                | New                       | Not enrolled | Economic hardship             |
| 1374 | Male  | 69 | Rural | Central        | Farmer                | Retreatment failure       | Not enrolled | Belief of being cured         |
| 1375 | Male  | 46 | Rural | Northern       | Farmer                | Relapse                   | Enrolled     |                               |
| 1376 | Femal | 23 | Urban | Southwestern   | Unemployed/unreported | Relapse                   | Enrolled     |                               |
| 1377 | Femal | 24 | Rural | Southwestern   | Farmer                | Retreatment failure       | Not enrolled | Death                         |
| 1378 | Male  | 56 | Urban | Central        | City worker           | Relapse                   | Not enrolled | Belief of being cured         |
| 1379 | Male  | 66 | Rural | Southern       | Farmer                | New                       | Not enrolled | Belief of being cured         |
| 1380 | Male  | 31 | Rural | Northern       | Farmer                | Retreatment failure       | Not enrolled | Other severe disease          |
| 1381 | Male  | 53 | Rural | Northern       | Farmer                | New                       | Not enrolled | Death                         |
| 1382 | Femal | 22 | Urban | Northern       | City worker           | Retreatment failure       | Enrolled     |                               |
| 1383 | Femal | 27 | Urban | Northern       | City worker           | Initial treatment failure | Enrolled     |                               |
| 1384 | Male  | 22 | Rural | Southern       | Farmer                | Retreatment failure       | Enrolled     |                               |
| 1385 | Male  | 68 | Rural | Southwestern   | Retired/Student       | Smear+ after 3 ms         | Not enrolled | Death                         |
| 1386 | Femal | 32 | Rural | Southern       | Farmer                | Relapse                   | Enrolled     |                               |
| 1387 | Femal | 64 | Rural | Northern       | Farmer                | Relapse                   | Not enrolled | Belief of being cured         |
| 1388 | Male  | 65 | Rural | Northern       | Farmer                | Relapse                   | Enrolled     |                               |
| 1389 | Male  | 45 | Rural | Western        | Farmer                | Initial treatment failure | Enrolled     |                               |
| 1390 | Male  | 34 | Rural | Southern       | Farmer                | Smear+ after 3 ms         | Not enrolled | Out-migration                 |
| 1391 | Male  | 64 | Urban | Northern       | Retired/Student       | Initial treatment failure | Not enrolled | Death                         |
| 1392 | Femal | 36 | Rural | Northern       | Farmer                | New                       | Not enrolled | Belief of being cured         |
| 1393 | Male  | 52 | Rural | Northern       | Farmer                | Relapse                   | Enrolled     |                               |
| 1394 | Male  | 15 | Rural | Northern       | Unemployed/unreported | Retreatment failure       | Not enrolled | studies                       |
| 1395 | Femal | 71 | Rural | Northern       | Farmer                | Relapse                   | Not enrolled | Non-standard treatment        |
| 1396 | Male  | 69 | Rural | Central        | Farmer                | Relapse                   | Not enrolled | Economic hardship             |
| 1397 | Male  | 38 | Rural | Southwestern   | Farmer                | Relapse                   | Enrolled     |                               |
| 1398 | Male  | 23 | Rural | Central        | Farmer                | Retreatment failure       | Not enrolled | Economic hardship             |
| 1399 | Male  | 21 | Urban | Southwestern   | City worker           | Relapse                   | Enrolled     |                               |
| 1400 | Male  | 15 | Rural | Other province | Retired/Student       | Initial treatment failure | Enrolled     |                               |

|      |       |    |       |              |                       |                           |              |                        |
|------|-------|----|-------|--------------|-----------------------|---------------------------|--------------|------------------------|
| 1401 | Femal | 48 | Rural | Southwestern | Farmer                | Retreatment failure       | Enrolled     |                        |
| 1402 | Male  | 55 | Rural | Northern     | Farmer                | Relapse                   | Not enrolled | Economic hardship      |
| 1403 | Femal | 52 | Rural | Central      | Farmer                | Initial treatment failure | Enrolled     |                        |
| 1404 | Male  | 38 | Urban | Southern     | Unemployed/unreported | Retreatment failure       | Enrolled     |                        |
| 1405 | Male  | 29 | Rural | Southern     | Farmer                | Retreatment failure       | Enrolled     |                        |
| 1406 | Femal | 49 | Rural | Southwestern | Farmer                | New                       | Enrolled     |                        |
| 1407 | Male  | 61 | Rural | Northern     | Farmer                | Initial treatment failure | Not enrolled | Non-standard treatment |
| 1408 | Male  | 37 | Rural | Southern     | Farmer                | Relapse                   | Enrolled     |                        |
| 1409 | Femal | 21 | Rural | Unknown      | Farmer                | Relapse                   | Not enrolled | Unknown address        |
| 1410 | Femal | 23 | Rural | Central      | Farmer                | Relapse                   | Enrolled     |                        |
| 1411 | Male  | 46 | Rural | Southwestern | Farmer                | Retreatment failure       | Not enrolled | Out-migration          |
| 1412 | Femal | 25 | Rural | Southwestern | Farmer                | Retreatment failure       | Enrolled     |                        |
| 1413 | Male  | 46 | Rural | Southwestern | Farmer                | Retreatment failure       | Not enrolled | Economic hardship      |
| 1414 | Male  | 51 | Rural | Central      | Farmer                | Relapse                   | Not enrolled | Belief of being cured  |
| 1415 | Male  | 55 | Rural | Central      | Farmer                | New                       | Not enrolled | Economic hardship      |
| 1416 | Male  | 43 | Rural | Southwestern | Farmer                | Retreatment failure       | Not enrolled | Out-migration          |
| 1417 | Femal | 41 | Rural | Southwestern | Farmer                | Retreatment failure       | Enrolled     |                        |
| 1418 | Male  | 44 | Rural | Northern     | Farmer                | Relapse                   | Enrolled     |                        |
| 1419 | Femal | 33 | Rural | Northern     | Farmer                | Relapse                   | Enrolled     |                        |
| 1420 | Male  | 48 | Rural | Central      | Farmer                | Initial treatment failure | Enrolled     |                        |
| 1421 | Male  | 31 | Rural | Western      | Farmer                | Retreatment failure       | Enrolled     |                        |
| 1422 | Male  | 43 | Rural | Southwestern | Farmer                | Retreatment failure       | Enrolled     |                        |
| 1423 | Male  | 44 | Rural | Central      | Farmer                | Relapse                   | Enrolled     |                        |
| 1424 | Male  | 42 | Rural | Central      | Farmer                | Retreatment failure       | Enrolled     |                        |
| 1425 | Femal | 41 | Rural | Unknown      | Farmer                | Relapse                   | Not enrolled | Unknown address        |
